# Supplementary material for: Identification, Molecular Characteristic, and Expression Analysis of PIFs Related to Chlorophyll Metabolism in Tea Plant (Camellia sinensis)
Source: MDPI journal article supplement (doi:10.3390/ijms222010949), 2021-10-11
Supplement: s1 [file s1]

>CrPIL1

MEEKPLAPSSSSSQPNMVSPSSGFKPKLNDQDYMELVWENGQILAKSRRPKNNGSFQNRRTQSLDLLEYAEYYDGRFKNIKNLGDTQVVPVSESQPRQNKDNDQEMINKKKSSSKIESDQRNVSKSNKRVASSTLIDDSAKGPKNVEVTTSPPEQSVAVGRSTELYFASSSMFSRGTSIDQSFCSLKRNLDTEEEESTYLISNNSDDDESDDDEKTQVHVRTRKPAAKRKRSTEVHKLSEKKRRDEFNKKMRALQDLLPSCVKDDKASLLDEAIKYMRTLQLQVQMMSVGNGLIRPPTMLPVGHYSHPMGLGMHMGAAATTPVVPQFLPMNVHGNFGPGINNVSSQMLSFLSHPTGLIPNSPIFSPLENCQQFVVPSCVPQTQATSFTHQFPKSASSSNLEDAMQFRGSNGYYR

>BnPIL1

MGKNPYASLSQPNIISPSSSFKPKLSDQASMELVCENGQIFAKSRRPNNNSYFQNQRTQSILDLYETEYDEGFKKNIKNLGGSQVVPVSESQRPQQDEDEKKRKINPSKTESERDVWKRNRKESSKLMNDLSKSLKNVEVITAPPDEQSIAVGRSAELYFASSSMLSGGTSRDLSCCSLKKRKYGDMEEEESTYLRNSDDGSDDGKTRVTTTTTRKTVAKKRSTEVHKLSEKRRNEISKKMCELQDLLPNCYKDDKVSLLEAIKYMRTLQLQVQMMSMGNGIIPSTSTMLAMGHYSPMGLGMHMGAAATTTSPVQFLPMNLQGTGFPRINEASSQMLSNFLNHPTGLIPNCPIFSPLESCSHQFVVPSCFPGTHSTSFTPFSESAPTSNLEDAMQFKGSNGY

>BrPIL1

MGKNLCASSSQPNMISPSSSLKPTLNDQDYMELVCENGQILAKSRKTNNNGYFQNQRRQSILDLYESEYDESFKNIKNHEETQVVPVSEQTNNKKRTKPSKNELERDLLKGSKRFESPTLNGYSLNGLKNVEVIKAPPDEQSEAVGRSTKLYFTPSSMLSRGTSRDLSSSSKKRKCGDNEEEEEETTYLSNSSDDESDDAKTRVPARTRKTMAKRRSTEVHRLSEKRRRHEISKMRALQDLLPNCYKDDKVSLLEAIKYMRTLQLQVQMMSMGNGFIQPSVMLPMGNYSMPMGLGMHMGAAATTPSLPQFMPMNQGTGFHGITNASSQMLSAFLNHPTGLIPNSPIFSPLESCSQQLVTPSCFPETQTTSFSQFPMMSGSTTNFEDAMQFRGSSGY

>EsPIF6

MMFLPSDDYCCRLTDKEYLELVFENGQILAKSQRSNGFSQQNQRTKTIMDLLEYAEYNEDFKKSIHDGGFIKNLGETQVVPVPEHQVVAAYETNMLESNNKHVDESTLIQTLKASSSKRIVVDHENPQIIEFIPPDEQSVVAERSVYSAFDSTDFTEDSGGSSYLSSSLDDESDGGRLRVPEKTGKASVKRRRSKELYNSPERKERNDINKKMRTLQDLLPNSHKDDNESLLDEAINYMTTLQLQVQMIMTGMNRFATPAMSLPLGSHYSQMGLATGMPMSVPQFLPTPFLGAGLPGISHSDEMRLFLSHPLGMPIQNSALFTPMENCLPQSVPPSCAAFPNQIPNLDDARTVGGFLSGKKKKI

>BnPIF6

MTSPSSSSSTFKPKLTDQEYMELVFENGQILAKSQRSNGFSMHNQRTKSIVDLLEYAEYNEDFKKTIHGADTSDKNLVDQVVPVPEPLVVAAYETNMLMNQLNLIQSLKASSSKRMVVDYENRKDIVPPDEQSVVAERSVELGYDSTDFTEDSEESTYQSSSLDDVRPQVPARTSNILVKRRRKQKETNDINKKMRNLQDLLPNSQKEDNEALLDEAINYMTTLQHQQVQMMTMGNRFVTPATVLPLGPQYSQMGLAIGMQMGVPQLLPAPVLGAGLPLVGTQADVLRLNHPVLMPIQDSAPFTPMENYLPQSVPPACAAFPNLIPNSTTSSNLDDARTHGGNLSGKESDKP

>BrPIF6

MMFVLTKLIYCSCRLKDQEYMELVFENGQFLAKSQRSKAFSLENQRTKSIVDLYEDEYNEDFMKSIIHGADKKLQVCSRNMFFIVAAYETKMLMNHHLNLVQSLKASSSKRMVVDYENRKDNEFIPPDEQSVVAERSVELGFDSTEFTEDESEGSTYLSSSLDDESDDP RPVPARTRKS LVKRRRSNSNELYNSEKNQRSDINKKMRKLQNLLPNSGKDDNESTLDEAINYMTTLQLQVQMMTMSNRFAAPAMMLPLGPHYSQMGLPTCMQMGLPQFLPPPVLGSGGNSADMLRFL

NHPTGLITPMQNSALFTPMGNYFPPSCAAFPNQIQNSTSLSNLDDATTDGGSLSGKK

>CrSPATULA

MISQREEREKKKKRVMGDKKLISSSSSLYDTRSSNHHPSSSDEISLFLRHIFDRSSPLPSY  
YSPATTTSMIGVHGDPHADNSRCFLSQHPPSDSAFMTTKRVGDFSEVLVGGSSAVGSASAA  
ACFGFSGGGNNAQGNSSGTRVSSSSVGASGNETDEYDCESEEGGEAVVDEAPSSKSGPS  
RTSSKRCRAAEVHNLSEKRRRSRINEKMKALQSLIPNSNKTDKASMLDEAIEYLKQLQLQ  
VQMLTMRNGVNLHPLCLPGTTLHPLQLSQIRPPEATNDPLLNHTNQFTSNSNAPEMINTVP  
SSYALEPSIRSHFGPFLLTSPVDMSREGGLAHQRLNLGHSNTNLTGEQAGFDGQQPDLKD  
RLT

>BnSPATULA

MADKKLIPSSSSTTSIYDTRSSNNSNHHPSSSDEISLFLRHIINRSSSPLPSHYSPATASTAEI  
GVNADPHADNPRCFVSPQTSKRAADYSEVLIGSGVGSSSAAACYGFSGGGGNNVAQGNS  
SGTRVSSSSFGASGNETDEYDCESEEGVEAVVDELLCKSRTSSKRCRAAEVHNLSEKRR  
RSRINEKMKALQSLIPNSNKTDKASMLDEAIEYLKQLQLQVQMLTMRNGVNLHPLCLPG  
TTLHPLQLSQLRPGVPPEATNDSL FNHTNHFASTSNAPAMVNTVASSYALEPSIRSHFGPFP  
LLTSPAEMSGEGLTHPRLNIGHSNTNLTGRQAVFNGQQPDIKDRLT

>BrSPATULA

MADKKLISSSSSSTTSIYDTRSSNNSNHHPSSSDEISLFLRHIFDRSSPLPSYSPATMTTV  
VHGDPHAENPRRFVSPQTSKVLVSGVGSSSATAACYGFSRVGGGNNNIAQGNSSGTRVSS  
SAVGASGNETDEYDCESEEGVEVVFDELCKSRTSSKRCRAAEVHNLSEKRRRSRINEK  
MKALQSLIPNSNKTDKASMLDEAIEYLKQLQLQVQMLTMRNGVNLHPLCLPGTTLHPLQ  
LSQLLPVVPPEATNDSL FNHTNHFASTSNAPAMINTDALEPSIRSHFGPFP LLTSPAEMSGEG  
VLTHSRLNVGHSNTNLTGRQAALNGQQPDLKDRLS

>CrPIF8

MSQCVDPCHIDDTVAAVAATTVRSTTAADIPMLDYEVAELTWENGQLGLHGLGPPRVTA  
SSTKYSTGAGGTLESIVDQATRLPNPKPTDELVPWFHHRSSRAAMAMDALVPCSNLQEQQ  
SKHGGVGSTRVGSCSDGRTMAGVKRARVAPEWSGSGSQRLTMDTYDIGLTSTSMGSPDN  
TIDDHDSVCHSRPQMEEEEKKGGGKSSVSTKRSRAAAIHNQSERKRRDKINQRMKTLQ  
KLVPNSSKTDKASMLDEVIEYLKQLQAQVSMMSRMNMPMMLPMALQQQQQLQMSLM  
SNPMGLGIGMGMPGLGLLDLNSMNRVAAAAAATAPSIHANMMPNPFAMTSPSWEA  
SSNDTRFQSPLIPDMAAFLACSSQPTTMEAYSMAALYQQMQQQQLPPSPNK

>EsPIF8

MSQRVPSWHIDGTPPVTVRSTKAANIPMLDYEVAELTWENGQLGLHGLGPPRVPAHSKYS  
TGAGGTLESIVDQATRFPNPKPTDDLVPWFHHRSSRAAMDALVPEQQSQHVGSCLDGH  
MAGKKRARVAPEWSASGSQRLTMDTYGFTSTSLDDNSSSGGKPKTKTTTIDDHDSVCHSR  
PQMEEEEGEKQGGGKSSVSTKRSRAAAIHNQSERKRRDKINQRMKTLQKLVPNSSKTDK  
ASMLDEVIEYLKQLQAQVSMMSRMNMPMMLPMAMQQHQQQQFQLSLMSNPMGLGIG  
MGMPGLGLLDLNSMNRVAAAAATPPNIHANMMPNPFVPITSPSWDASSNDTRFQSPLIP  
DPMAAFLACSSQPTTMESYSMAALYQQMQQQQLPPSPNQK

> BrPIF8

MSQCVPNYHIDDTPAATVRSTKAADIPTLDYEVAELTWENGQLGLHGLCPPRVPAPSKYST  
GAGGTLESIVEQATRFPNPKPSDELVPSFHHRYSRVGMDALVPEQQSQPATGVGSCLDGH  
MDCGKKRARVAPEWSASGSQRLTIDTYGFTSTSLDDNSSSGGKPFKTTNIDDHDSVCHSRP  
QMEEEEEQKQTGGKSSASTKRSRAAAIHNQSERKRRDKINQRMKTLQKLVPNSSKTDKA

SMLDEVIEYLKQLQAQVCMMSRMNMPSMMLPMAMQQQQQQQLQLNLMSSSMGLGLRM  
GMPGLGLVDLSSMNRAATATAPNIHANMMQNPFVPMSTSWDASSSIDPRFQSPLIPDMS  
AFLACSSQPTTMEAYSRMAAFYQQMQQQQLPPSNPK

> PvPIF8

MSQCVPSWDLDENPTYPRPSHRSRNSTAPDVPMFDYEAELTWENGQLAMHGLGPPRV  
PTKPMATTSTTKYNWEKPRASGTLESVVNQATILPQSNQPPFDTATNEEIAPWFDQHRAAA  
AAAMTMDALVPCSNRPEKRTTHAMDAVPRLGGTCVVDCSTRVGSCSGPAATQDEDDVLL  
KKARVARFPVAPEWNNRDQSVSGSATFGRDSQHVTHDTHDYDMDIGVGFTSTSMGSPENTSF  
AEPCTKATDDDDHDSVCHSTPQREAGDEGKKNKNGKSSVSTKRSRAAAIHNQSERKRR  
DKINQRMRALQKLVPNSSKTDKASMLDEVIEYLKQLQAQVQMMNRLNMSPMMLPMAM  
QQQLQMSMMAPMGMGMGMGMGMGMGMGMGMGMGMGMGMIMDVNTMNRPNINGISSVLTNPFM  
PITSWDASAAPPVMTDPLSTFLACQSQPTTMDAYSIRMAAMYQQLQQQPPASNSKS

> SsPIF8

MSQCVPSWDVDDNPPPPRVSLRSNSSSTAPDVPMFDYEAELTWENGQLSMHGLGLPRVP  
VKSPATAATNKYTWEKPRASGTLESIVNQATSLPHRGKSTLNGDGVCGNFLVPWFDRHGSA  
ASANTVTMDALVPCSNRKQSKQGMESVPGTCMVGCSTRVGSCCGNQGAKGHEMSGRD  
QSVSGSATFGRDSKHVTLDTCDRELGVGFTSTSINSLENTSSAKHCTKTTTVDDHDSVSHS  
KPMREDGDDEKKKRANGKSSVFTKRSRAAAIHNQSERKRRDKINQRMKTLQKLVPNSSK  
TDKASMLDEVIEYLKQLQAQVQMMNRINMSSMMLPLTMQQQLQMSMMSPMGMGLGM  
GMGMGMGMGMMDMNSINRANIPGIPVHLPSAFMPMAASWDAASGGDRLQGTPATVMP  
DPLSTFFGCQAQPMTMDAYSRLAAMYQQLHQPPPGSGSKN

> CrPIF7

MSNYGVKELTWENGQLTVHGLGEEAEPTTSNNPIWTQSLNGCETLESVVHQAALQQPSK  
LQLQSPNGPNHNYESKDGSRSRKRGYTQEMDRWFAVQEESHKVGHSVTASASGTNMSLA  
SFESGRSLKTARTGDRDYFRSGSETQDTEGDEQETRGDAGRSNGRRGRAAAIHNESERRR  
RDRINQRMRTLQKLLPTASKADKVSILDDVIEHLKQLQAQVQFMSLRANLPQQMMIPQLP  
PPQSVLSIQQQQQQQQQQQQQQQQQQQQQQQQQQQQQFQMSLLATMARMGMGVSGNAYGGL  
VHPPPPPPPLMVPPMANRDCTNTSSAALDPYSVFFAQTMNMDLYNKMAAAIYRQQSD  
QTSSKVNTGMPSSSLNHEKRD

> EsPIF7

MSNYGVKELTWENGQLTVHGLGEEVEPTTSANPIWTQNPNGCETLESVVHQAAMQPSKL  
QLQSQNGPGHNSKSKDGSCSRKRGYPQDMDCWFAVQEESHKVGHSVTASASGTNMSWA  
SFESGRSLKTARTGDRDYLLSGSETQDTEGDEQETRGEAGRSNGRRGRAAAIHNESERRR  
RDRINQRMRTLQKLLPTASKADKVSILDDVIEHLKQLQAQVQFMSLRANLPQQMMMQLL  
PPPQSVLSIQHQQQQQQQQQQQQQQQQQQQQQQQQQQQFQMSLLATMARMGMGGGGNAYGGLVPPPPPPPL  
MVPPMANRDCTSGSSPALDPYSLY  
LAQTMNMDLYNKMAAAIYRQQSDQTTKVNAGMPSSSSNHEKRD

> BnPIF7

MSNYGVKELTWENGQLTVHGLGEGVEPTTTSANLLWTQALNGCETLESVVPQAALQPN  
KLQSQNGRDHNSESKDGSCSRKRGYPQEMDCWFSGQEESHKVGHSVTASASGTNMSW  
ASFESGRSLKTARTGDRDYLFSGSETQETEGDEQETRGEAGRSNNGRRGRAAAIHNESER  
RRRDRINQRMRTLQKLLPTASKADKVSILDDVIEHLKQLQAQVQFMSLRANLPQQMMMP  
QLPPPQSVLSIQHQQQQQQQQQQQQQQQQQQQQQQQQQQQFQMSLLATMARMGMGGGGNAYGGLVPPHPPL  
MVPPMDNRDCTNASSASLDPYSAFLA

QTMNMDLYNKMAAAIYRQQSDQTPKVNTGMPSSSSNHEKRD

>BrPIF7

MSNYGVKELTWENGQLTVHGLGEGVEPTTTSANLLWTQALNGCETLESVVHQAALQPN  
KLQSQNGRDHNNSESKDGSCSRKRGYPQEMDCWFSGQEESHVRVGHSVTASASGTNMSW  
ASFESGRSLKTARTGDRDYLFSGSETQETEGDEQETRGEAGRSNNGRRGAAAAIHNESER  
RRRDRINQRMRTLQKLLPTASKADKVSILDDVIEHLKQLQAQVQFMSLRANLPQQMMMMP  
QLPPPQSVLSIQHQQQQQQQQQQQQQQQQFQMSLLATMARMGMGGGGNASYGGLVPPPP  
PLMIPPMDNRDCTNASSASLTDYPYSAFLAQTMNMDLYNKMAAAIYRQQPDQTPKVNTG  
MPSSSSNHEKRD

>TcPIF7 Theobroma cacao

MNQCVPNPNLKHQRQEQVEEEGNRSSHVLNSSNAYLVPMSNYEVAELTWENGQLAM  
HGLSGLLPTAPPTKPTWGRSNDTLESIVHQATCHKQKQNFNLLQHDQTRSNRSSIAASSVG  
NWAESSRLPVAAAAALLKKRARSDDQCRKNLSGGIQEDRADRSACASAAAFCRDND  
ATMMTWASHESPMKTKTADDEDSSYHDGSENQDEDRETRGETGRSHSTRRSRAAAIHN  
LSERRRRDRINQKMRTLQKLVPNASKTDKASMLDEVIEYLKQLQTQVQMMSMRMPQM  
MVPLGMQQHLQMSLLARMGMGMLDINSMARFPSQSLPPLMHPSPVTPPTFLPPFVAPP  
MIPTREAAQANSDAISNASVPLDPYCALLAQTVNMDLYSKMAALYRPQINQTTQTASSP  
SRSNNVQED

>CrPIF5

MEQVFADWNFEDNFHMSTNKRISIRPEDELVELLWRDQGQVVLQSQARREPSVQVQNHKQ  
ALRKPHNIFLDNQETVQKPNNALDDQETVSWIQYPPDDVVDPFSEFSSHLFSSINHLDG  
PEKPRSIEETVKSEAQAMAPPKFRSSVITVGPSHCGSNQSTNDHQVNTLPVSMTDRSKNVE  
ERLDTSSGGSSGCSYGRNNKETVSGRSVTIDRKRKHVMDADQESVSQSDVRLTSTDDHQ  
VTGNKSSQSRSGSTRRSRAAEVHNLSEERRRRDRINERMKALQELIPHCSKTDKASILDEAID  
YLKSLQMLQVMWMGSGMAAAAAAATPMMFPGVQPSPYMNQMAMQSQMQMPQF  
PVMNRSAPQNHPLVCQNPVQLQLQAQNMQLSDQLARYMGGFPQMPSAANQAVQQPTT  
DMMKFGSPAGPQSQLSAPATTDSLRMG

>EsPIF5

MEQLFPDWNFEENFHMSTNKRISIRPEDELVELLWRDQGQVVLQSQARREPSVQVQAHKHD  
QTLGKPNNTLLDNQVRKPNGTILEDQETVSWIQYPPEDVVDPFSEFSSHFFSSIDHLDGP  
DRPDKPRTIEETAKHDAHDQSMAPPKFRTSVLTVGPSHCGSNQSTNDHQVTHPPVSISDRS  
KNVEERLDTSSGGSSGCSYGRNNKETGSGRSVTIDRKRKHVMDTDQESVSQSDVRLMSM  
EDQAIGNKSSQSRSGSTRRSRAAEVHNLSEERRRRDRINERMKALQELIPHCSKTDKASILDE  
AIDYLKSLQMLQVMWMGSGMAAAAAAATPMMFPGVQQSPYINQMAMQSQMQLS  
QFPVMNRSVVQNHPGLVCQNPVQLQMQAQNLSEQLARYMGGFPQMPATTQTQTQTQ  
MQTQMQTQTQTQTQMQTQMQTQTQTQTQTQADPTPVGQQSQLSAPATTDSLRLGKL  
C

>BnPIF5

MEQLFSDWNFEDNFHMSSNKRISIRPEDELVELLWRDQGQVVLQSQVRREPSVQVQTHKH  
DQALRKPNNTYLDNQETIRKHENNVQGDQETVSWIQYPPEDVVDPFSEFSSHFFSSVDH  
LDGPNHPKKPLTIKEAAKPEAKAMAPPKFRPPVSVGPSHCGSNQSTNDHQVTHPPVSMS  
DRSKNVEERLDTSSGGSSGCSKETESGRSVSISRKRKHAMDTDQESMSQSDVRLMPTDDQ  
TMGNKSSQSRSGSTRRSRAAEVHNLSEERRRRDRINERMKALQELIPHCSKTDKASILDEAID  
YLKTLQMLQVMWMGSGMAAAAAAATPMMFPGVQSSQYINQMAMQSQMQMPQFP

VMNRPAAQNHPGLVCQNPVQFQMQAQNQMLSEQLARYMGGFPPMPATTQTQTVQQPM  
DMMRFGSQVGQQSQLSTPVTDDSLRMGKTG

>BnPIF4

MEHQGWSFEENYNLSNNRRFIRPQDELVELLWRDQVQVQQSQTHRDQTQAQAQAQKQD  
QETLRSNTFLEDQETVSWIQYPLDEDPFESDFTLPFFSTIDPLQRPASETVKHEAGPVPPD  
QVMPPPKFRLTDSSSGGRELGKEQYSVMTVGPSHCGSNQSQTDLDVSLTHDPSKTIDERL  
YSTENSSSGGSSGCSFGKNNKEIACGRSITAERKRKHIMDTDESVSQSDAIGNSKSNQSGS  
STRRSRAAEVHNLSERRRRDRINERMKALHELIPHCTKTDKASILEEAIDYLKSLQLQLQV  
MWMGSGMAGAAATPIMFPGVQPPPPFIRQVQSPVLLPRFPVMDGSAIQNNPGLVCQNPV  
QSQVFPDRFGRYVGLFPRMQGTSQPMEMMTFGSPAGQESQRTSAPTKTTDGPR

>CrPIF4

MEHQGWSFEDNYSLNNRRSIRPQDELVELLWRDQVVLQSQTHRDQTQTQKQDHHEG  
ALRSNTFLEDQETVSWIQYPPDEDPFETDDFSSHFFSTVDSIQRQTSETVKPKVPDPQVM  
AKTKAGSDHPQVMPPPKFRLTDSSSGNMELGKEQYSVTTVGLSHCGSNPSQSDLDVSM  
HARSKNIKEKLYPNASSSSGGSSGCSFGKDIKEMASGGSITDRKRKHIMDTDESVSQSDA  
TGKNSNQRSGSTRRSRAAEVHNLSERRRRDRINERMKALQELIPHCSKTDKASILDEAIDY  
LKSLQLQLQVMWMGSGMTAAPMMFPGVQPPPFIRQMIPVPLPRFPVLRPAIQNNPGLD  
SQNPVQNQVFSRFAKYIGGFPQIQMQAASQAMEMMRFGSPAGQQSQPSAPTKTTEG  
PRLDH

>BrPIF4

MEHQGWSFEENYNLFNNRRFIRPQDELVELLWRDQVQVQQSQTHRDQTQAQVQAQKQD  
QETLRSYTFLEDQETVSWIQYPLDEDPFESDFTSPFFSTIDPLQRPASETVKHEAGPVPPD  
KVMPPPKFRLTDSSSGVRELGKEQYSVMTVGPSHCGSNQSQTDLDVSLTHDPSKTIDERL  
YSNENSSSGGSSGCSLGKNNKEIACGRSITADRKRKHIMDTDESVSQSDAIGNNKSQRSG  
STRRSRAAEVHNLSERRRRDRINERMKALQELIPNCIKTDKASILEEAIDYLKSLQLQLQV  
MWMGSGMAGAAATPIMFPGVQPPPPFIRQLQSPVLLPRFPVMDGSAIQNNPGLVCQNPVQ  
NQVLPDRFGRYVGLFPRMQGTSQPMEMMTFGSPAGQESQRTSAPKTTDGPR

>CrHFR1

MLNNQDFMELNWRNDVGSLAVKDQAGMSERARSDERLINGLRWSYGYFDHDQTDNY  
LQLVPEIRKEEEKPKEDLLVTVPDEHSETDDHHHSKDFSYSRSHSRCYLNRKHDNPKKRCF  
QISSDEESEDFTREVPSVTEKGFKKRRRDEMCDKMRTLQQLVPNCHKMDKVSVLDAID  
YMKNLQLQLQVMSMMGMNPYFPTATFNFGMQNHLLTAMALAHGQNPVNQTTSTPFIPA  
LNWPLPPFANLSFPHLSNQSPFLTASAASSQYLCGLVPCFSPSPLDFSSRTMGL

>EsHFR1

MGWRSDVGSLDVKDQCITEREIRSDERLINGLKWRYDYFDHDQTDIHLQIVPEIHREEE  
NSKKDLTLVPDEHSEAGDHLSKDNSESSDNRCYLNRKREKPKRRRYLISSDNDSEGCT  
REVPSVTRTGFKKIRDEMMSNMKRTLQQLLPNCHKTDKVSILDKTIEYMKNLQLQLQV  
MSTMGMNPYIPPVTLNFGMHNHLLTAMAMAHGLNPANQTASSPLTPATNWPLPPLSYLSF  
PHSSNQPLFLTASAASSPQCLCGLAPCFPIKFP

>BrHFR1

MGFHFLGQILSPLPHRIIFSNNPLSPLSLWFVNMLNNQDLMGLEWTNDVESLALKDQDISVR  
ARSGEDRITNGLKWSDDYFYDQADFHLQIVPEIRKEEENSKKDLTLVPDEHSETGDHH  
LHIKDYSDDSYNRRFLRNKHAKPKRRRVQILSDDESDFSRKVPLVIRKSSKRRIRDDMMS  
NKMRTLQQLVPNCHKTDKVSVLDKTIEYMKNLQLQLQVMSIMGMNPYIPQATLNFGMH



EHDDQDNQSTG

>CrALC

MGDSDVGDRLAPASSSDELSSFLRQILSRAPTAHPSSPPKTSVSSGETFPSVGNGVAETSQD  
KYAFENKRNGGRQKNSLKRNDMAHFHNLSEKKRRSKINEKMKALQKLIPNSNKTDKAS  
MLDEAIEYLKQLQLQVQTLAVMNGLGLENPIRLPPVLPPTQTLINETLEQDLNLETLLAAPH  
SLEIPQASQEMCFSAATLF

>EsALC

MGDSDDGDRLPPPSSSDELSSILRQILSRTPTAQSSPPKRIVSSAEMFDRSFPPVSAGAVSS  
AGYAVAETGDKKYAFENKRNGARQNSLKRNIDTQFHNLSKKRRSKINEKMKALQKLIP  
NSNKTDKASMLDEAIEYLKQLQLQVQALAVMNGLGLENPMRLPPVIPPTQTRVDEALQPEL  
NIETLLGGSHSLVHHREPPEASQEMCFSTAARLQENT

>BnALC

MGNSDEGDRLPAPSSSDELSSILRQVLSRTPTAQPSFSPKKIVSSAEMFNRTFPLVPGGAVSY  
AACAVAETGEGKCGFENKRNGARQNSLKRNIDAQFHTLSEKKRRSKINEKMKALQKLIP  
NSNKTDKASMLDEAIEYLKQLQLQFQTLAAMNGLGLENPLRLPPLPPTQTGITGTSEQGLN  
LETLLGGSHSMANLEPPEPTQEMCFPTTLL

>BrALC-like

MAFKVEGREDLVTLKRNGARQNSLKRNINAQFHNLSERRRRCKINEKMKSLQKLIPNSN  
KTDKASMLDEAIKYLKQLQLQVQTLAVMNDLCLNPMRLPPVLPPTQTRFNGTLQQEQHF  
ATLLGAPHSVMNHEPPRATQEMCFSTATLL

>PtPIF1

MNPYVPDFEMDDDDYSLPPPPSTHTRPRKPAMQEEEEIMELLWQNGQVVMHSQRSQKKSSP  
PPELDDAVLPADQLPGTKEIRSSHQQQEHHLFMQEDEMASWLHNPLNDTNFDHDFC  
ADLLYPPTASTASITREAAVTNAAASTVRGATQRMARSYPASAPRPPIPPVRRAEVVQNF  
AYFSRHRAGGVSESGRSNSKSVVRESTVVDSCETPTARISSETAFARSADNTCGTINGAAVA  
GTVSSAPSSNRETMTNPCEMTSTSSPGCSSASAELPALMSPVEDRKRKGREEEAECHESED  
EFESADAKKRIRGSMSSKRSRAAEVHNLSERRRRDRINEKMRALQELIPRCNKSDKASML  
DEAIEYLKSLQLQVQMMSMGCSMVPMMPFGFQQYMPPMGIGMGMGMEMGLSRPMMP  
FPNILAGAPSATPAAAAHLVPRFPVPPFHVPPIPAPDPSRVQPTNQVDPMLGSPGQQNPQNP  
RVPNFVDPYQHYLGLYQMHLPGVPRNQAMAQPSTSKPSTSRVAENPGNHQSG

>SIPIF1

MNHSVPDFDMDDDFSLPASSGITRTKKSAMAEIIIIMELLWQNGQVVMQSQNQSLKKPH  
IGNSGGGGDAVIPSDQAVSREIRHVEETTPHHLFMQEDEMASWLHYPLDDPSFERDLYS  
DLLYPTPTSTFTTAALPRENRTSTFEIRPPPPQPSPAAPIGTAPRPPIPPSRRTVTENSNRFQNF  
GHFSRLPKARLEPGQANLSKSPRDSTVVDSNVTPITGQESRVTLIPDNVVAVPGGNVGCST  
VNGSTGTATASTAIPTTTCDISMTSSPGSGNSVSASAEPPAPAPAPSHKGAAPTATAAA  
DDRKRKGREMEDEGQNEAEFESPDTKKQARGSTSTKRSRAAEVHNLSERRRRDRINEK  
MKALQELIPRCNKTDKASMLDEAIEYLKSLQLQVQMMSMGCGMVPMMPYPMQPYMPP  
MGMGMGMGMGMMDIGMNRPMVYPPLLPGTAMQNAAAAAQMGPRFSIPQFHLPPVPVP  
DPSRMQASSQPDPMNSLVSHNSNQPRLPNFSDPYQQFFGLQQAQVALPQNQAVEQPSNS  
KSGSSKEVGNPGNHQSG

>PtPIF4

MNHCI PDWNLEGDLPVSNQKNPIEPDNELVELLWRNGQVVMHSQTQRKPNPHVQKHDSP  
TVRGYDSTLNSSHLIQDDET VSWIHDPLEDSFEKEFCSNFFSELPPPLSDQISEEKSAKFDAS

KTSHQQQLNNNKHPVVPEFPGNPMPPPRIQVQEQNHISVGGFGKAVNVNFSQFSAPLKV  
GDFRSSSRQFGGQGSQGEARECSVVTVGSSNQTPRDRFLSRASGNAIETGTGLSAGP  
SIDDPRKVISQSERGKGDTLDPTATSSSGSGSSSFARTCKQSAVPSRGQKRKTMDAESEE  
CQSEDAELDSAVANKPAKRSGSTRRSRAAEVHNLSERRRRDRINEKMRAHQELIPHCNKT  
DKASMLDEAIEYLKSLQLQLQVMWMGSGIVPVMFPGVQHFMSRMGMGMGMGPPPLPS  
MQNPMHLPRVPLVDQSISMTPTQNQAVICQTPVLNPVNYQNQMNPFTSDQYARFMGFH  
MQAASQPMNMFRRFGSQTQQNQMMAPPNSGGGPLSAGTAASDAPPSGKTG

> ZmPIF4

MQSQSHRKVPPRPEKAAAVAAPPAPASVPQEDEGGLWFPFALADSLDKDIFSEFFCEAPTP  
APAAADAAPAASGGGTGTEAGGKSCGGDVPVPAEDDRRGGGGACAVSAGDPCLMPPP  
KSTPASCRRQQTMSLANGGDNAGGDLPLVRAGAEAGASSMLSAIGSSICGSNQVLVQR  
AACAPGRASASGSGTARGDGSAAALPSAVGSANANAVGGGRGHEASSSGRSNYCCFGA  
ATTTTTTTTTTEPASTSNRSSKRKRLDTESESPSEDAESGSAAMLARKPPQKMTTARRSRA  
AEVHNLSERRRRDRINEKMRAHQELIPHCNKTDKASMLDEAIEYLKSLQLQVQMMWMG  
SAGIAAPPVPMFPGVHQYLPRMGVGMGAAAAAALPSMPRLPFMAPQPVVPSAPVSVGPV  
PAYRGHMPAVGITEPYGHYIGVNHLPAPPPPVQHYAQGVSYYPPLGATAKAVQQAEE  
LHHVPGPGGSIMPAGAAPGVLLPESAQGRGPGTVPCAPPFSSSASVFGLQMGALR

>SIPIF4

MNPYLPEWNIETELPAPHQKKPMGFDHELVELLWRNGEVVLHSQTHKKQPGYDPNECRQ  
FNKHDQPTIRVAGNQTNLIQDDETVAWLNCPIDDSFDFKEFCSPFLSDISTNPHLGEEPKSIR  
QSEDNNKVFKFDPLEINHVLQSHHSGFDPNPMPPPRFHNFGSAQQKHHVGGDQKGVNF  
PPPIRSSNVQLGGKEARSNMLQDIKEGSVMTVGSSHCGSNQVDTSRFSSSANRGLSAAM  
ITDYGKISQSDTMDRDTFEPANTSSSSGRSGSSYARACNQSTATNSQGHKRKSRDGEEP  
ECQSKADELESAGGNKSAQKSGTARRSRAAEVHNLSERRRRDRINEKMKALQELLPHST  
KTDKASMLDEAIEYLKSLQMLQMMWMGSGMASMMFPGVQHYISRMGMGMGPPSVP  
SMHNAMHLARLPLVDPAIPLTQAAPNNQAAAMCQNSMLNQVNYQRHLQNPFPDQYAS  
YMGFHPPLQGASQPINIFGLGSHTAQQTQQLPHPTNSNAPAT

>OsPIL13

MNQFVPDWSNMGDASRTLGEDDNLIELLWCNGHVVMQSQNHHRKLPPRPPEKAAAAAV  
QEDEAGLWFPFALADSLEKDIFSDLFYEAPVAATAEAAPAGPGAGADGEGKTCKGDAAM  
AEEERGPGAASEAPRELMPPPKSTNASCSRQQTMSLADGGDNAGDLSELVRARRSSGG  
AARRKAEAGGGGGGASSMLSAIGSSICGSNQVQVQQRASEPGRRGAPPSAVGSANAIP  
CGGRDHGHGHEATTVAASSGRSNCCFGTTTTTEPTSTSNRSSKRKRLDTTEDSESPSEDAE  
SESAAALARKPPAKMTTARRSRAAEVHNLSERRRRDRINEKMRAHQELIPHCNKTDKASML  
DEAIEYLKSLQLQLQVVKMMWMGSGMAPPVPMFPGVHQYLPRMGVGMGAAAAAMP  
MPFMAAPQPVVPTPPVNHLDLGVNHLQPPPTQLYLQGVGYYPPLGAKAVQQQNPLHVP  
NGSIMPPPENAPNTGSG

>SIPIF3

MPLSEFLKMAIGKPESGQQKISSTSNLSSFPENDLVELKWQNGQIVMQGQNSSAKKSTVP  
NNLPSSASGDRDKYTGNSSTSKIGKFGLMDSMLNDMSLTVPTGELDLIQEDEGVPLWGY  
ADDSLQQDYCAQLLPEISGVTANEQSGQSVFGLINKRGSSDKMIGDSHSPVHNNAVNER  
RNTSKVSPSSRFSPSSLPSQKGHASIPTLESVSDVFSSKNSNTPLSVLGESNQSKASA  
GDAKSNRIQKQNMMPGNRSNLLNFSHFSPATLVKAAKLQSSTGGSNISGSPILEAKGKKGE  
EKVTIGDNHVSAAATENFLTSSKDNFPHYPTNGVSSQLESRPSGASFHDRSCQAEQSDNAF



RDCSSNNDNTHDHFTSAKATKDIADGERNVEHGVACSSVCSGSSAERGSSDQPLNLKRKT  
RDNEEFECRSEDVEEESVGIKKPCAARGGTGSKRSRAAEVHNLSERRRRDRINEKMRAEQ  
ELIPNCNKADKASMLDEAIEYLKTLQLQVQIMSVGAGLCVPPMMFPMQHMHGAQMPHF  
SPMSLGMGMGMGFLGMLEMNGRSSGYPMYPMPSPVQGGHFPSPPIASTAYPGIAVSNR  
HVFAHPGQGLPMSIPRASLGPLAGQPSTGAAVPMNVAREGVPVEIRGAQPNLDSKTPVHK  
NSQIVQNAEASCPQNQTCSQVQATNEVLEKSAQKNDQLPDVIGSAANRLTNRTNVPGNEA  
GPSL

>PtPIF3

MPLSELLRYMAKGKTDSSQEKNPACSTDLSFVRPENDFGELIWENGQIQYSRARKIQTENS  
LPPKIRDKDIGNGTNTKTGKFGTMESTLNELLAVPAVEVRANQDDDMVPWLNYPLEPLQ  
HDYCSDFLPELSGVTVNEHSSQSNFSPDKRSCNQSITDSHTVSVHNGNLNEQGDVVMNS  
SAGDIDAKRPTSASQLYPSSEQCKTSFPFFRSRDSTKKDDSTSNVHHVIAPDSIRAPTSG  
GGFPSIKMQKQVPAPSPINSSLINFSHFARPAALVKANLQNVGMRASSGTSSMERMQNKD  
KGSIGLPKETDSHCRPNMMSSKVEVKPTEVKPAEGSVPAELPEEMSQEGDSKSDRNCHQN  
FGESAIKGLEDVEKTTEPLVASSSVGSGNSAERPSSDDPTENLKRKHRDTEESEGPSEEIIV  
QDAEEESVGAKKPASARAGNGSKRGRAAEVHNLSERRRRDRINEKMRAEQELIPNCNKV  
DKASMLDEAIEYLKTLQLQVQIMSMGAGMYMPSMMLPPGMPPHMAAHMGQFLPMGV  
GMGMGFRMGMPDMNGGYSGCPMYQVPPMHGAHFPGSQMSGPSALHGMGGPSLQMFG  
LSGQGLPMSFPAPLMPMSGGPPKTNREPNACGVVGPMDNLD SATASSSKDAIQNINSQ  
VMQNNVANRSMNQTSSQQVPIHGSSSLPRERKH

> OsPIF4

MVLDRCKDWRISFCLLAWRSSDGELVELLWQDGGVVAHAQTRHRSSDVLARSGVTGEEE  
TASAWFADGGGGGGGDDDALGLGMGRDIYSQLWHSFANVDGHAAGALALATPTPTPRA  
AARSDDVSSRLDEADLSICGSNAVVALPADDDDDIDAAAPREEEEEEEEGPGAARAAG  
ASSSGSGSGSGSYPLFKRGREELVDSLSEVADETRPSKRPAAKRRRTAAEVHNLSERRRR  
DRINEKLRAEQELVPHCNKTDKASILDEAIEYLKSLQMQLVQIMWMTTGIVPMMFPGTHQL  
MPPMGMGLNTACMPGAQAQGLNQMQRTTYMNNSLPNQMPQIPSPAMNAPSVPDDMQ  
NDNRIRGPRNPFLHCNDTLTATAQVPGLFTYGSQIAEQNEIQELLSGAVIPSSSDGTIK

>SISPATULA

MANNNVYYHNANFSLTDPDPEPDDISVFLRHILLPSSSSSSSSSNFMALKSNEMQYSSSLPH  
LMPNNNQGNLSSMMNSSACGIFSSSYGVCNGATTVSSSSVGTIDYDPDEYECESEDGTE  
DLGAEASVQPPSRNTSKRSRAAEVHNLSEKRRRSRINEKMALQKLIPNSNKTDKASMLD  
EAIEYLKQLQLQVQMLTMRNGLNMYPLGLPRMLQQNQLSHQKVGLCEGNAFTNAKVAG  
NLQVNQDASLNAIFNPTENCTETKVTTPITMSNINRSDSAFELESSMNIHLDPFQLSRSTK  
EIWREDDLPLYGMNELTTKTASTGSNLAFSVPLD TDASNLKRSTREACLLRYQFGAVNET  
NLDCDQLLSQQLYR

>PtSPATULA1

MGDVYNNETNNINNTCSASSSSRHYHRSSDDISLFLHQILPRSPSTSSSSFIGPQTLQPFV  
PAPFDDPLRSGVILGVDSSGGGGGALWSGNVRTRLIMSENETDHECDCESEEGLEALIDEIS  
AKPAPPRSSKRTRAADVHNLSEKRRRSRINEKMALQNLIPNSSKTDKASMLDEAIEYLKL  
LQLQVQMLSMRNGTSLHPMFLPGVLQPSQLSQVRMGFDEEIGSKHMNMTTSVPLDGEAR  
LQTMLTLPDHCTSSNQASNPIHSETSSGFQSTIQAHFSPFPLRVSSSEETWRKDILPGQQLNV  
SHAERNPSEFELAAAVTTSLPFGIACDLKDSISLEACVIGRDQNEGVCLENMEHNLILSQD  
LNSTRTGRGAGNHEIEIEKLDI

>OsALC

MMDGRGSQEEHLDLIMRHHASMGDLRCESEEALGSSESEQPTRPARPRGKRSRAAEVH  
NLSEKRRRSRINEKMKALQSLIPNSSKTDKASMLDDAIEYLKQLQLQVQMLSMRNGLYLP  
PVNLSGAPEHLPIPQMSAALDQNSAKASDPSVVLQPVNQTSGALLPFELASQHKPLFLPGV  
PNATALEPRFLVESSRSNLQSLRFTEPAEMIYPDEMMLKHRLTSASESTIVPGTDEKSVRQN  
TYMMNADRFDRYALSKDQLQHIMPKNTESVLDMPHLQRLQTSDDTKVRVEGRIKVN

>SISPATULA

MADPYRTNPHASSSLESEDMSFFLNFLQGTPASSATAAAGFYNRSGPAPVAESSSSLNFS  
DPGRFYAAEFKEGVENVFASAGLGECDGMNSANRREFLEDDKVDNFGFSSEECGDLDMP  
SDPTHPRSSKRSRAAEVHNLSEKRRRSRINEKMKALQNLIPNSNKTDKASMLDEAIEYLKQ  
LQLQVQILTLRNGLSLYPGYVPGSLQSVQLPSGNEFDGRSFMLSANGGATLPVNREMPQT  
AFEISNQNPBGKPTITSHNTENAVALETTIQNHYGLLNHLASSKDMCRDNTLSRLHLDMSC  
SGNNSSSGVSS

> PtSPATULA2

MADLYGPARSPTTEPEEISTFLQQFLGNNSSSSSSKFIHHALSTPVETGSAAVEFLDCHLFGR  
SGTECGAGAGNSGVNLSDPGGYVYKGVVDNAVSSGISKRRGASVEDDLGDFSCDSEKGA  
EVAEVQANAVRPRSSSKRSRAAEVHNLSEKRRRSRINEKMKALQNLIPNSNKTDKASMLD  
EAIEYLKQLQLQVQMLTMRNGLSLHPMCLPGALQPMQPPLSGMSFDEGNGLLTDTLTGI  
FSANEESVQTALNLPSCQTVSNQPIAIPSGTNITSSSETSFGFEPLIHVNHAPFNLCTSSKEIC  
REATPQAQIEMNQTVKTSPSGLQSQQGTIEDGKACKRTR

>PtSPATULA3

MEDLYGAAAATEPEEISTFLHQLLHNNSSSPSKFMHHALSTPVENGVELLDRHRFSETECG  
AGVNFSDPDGYAKEGVGNVSVKRGVSVEDDLGDFSCDSEKGVVQANTARPRSSSK  
RSRAAEVHNLSEKRRRSRINEKMKALQNLIPNSNKTDKASMLDEAIEYLKQLQLQVQML  
TMRNGLSLHPMCLPGALQPMQLPLSGMSFDEGIGLLTTNTLTGIFSANEESSEQNSLNPT  
QCTISNQPIITPSGTNITSSSETNFGFEPQIHVNHAPFNLSTSSKEICREGTPQAKLEMNQTTKT  
SPSGVA

>PtPIF8

MSHQCVPSWELDDNPTTAPKVSLRSHSNAGPYMPMLNYEVAELTWENGQLAMHGLGQ  
PRVPAKPIASTSPSKYTWDKPRASGTLESIVNLATCIPQCNKQTFDNSGSDHDFVPWFNHH  
RASASATMTMDALVPCSKRSDQERTTRVIDSSPAGLGTDCVVGCVSTRVGCSTAPTATQNEV  
GLLTRKREKVARVPVPAEWSRDQSVNRGATFSKKDSQQVTVDSCEERELGVGFTSTTSFGS  
QENTSSGKTKCTNTADENDSVCHSRPQREAGDEDDKKKGNGKSSVSNRRSRAAAVHN  
QSERKRRDKINQRMKTLQKLPNSSKTDKASMLDEVIEYLKQLQAQVQMVSRMNMQPM  
MLPMALQQQLQMSMMAPISMGMAGMGMGMGMGMGMGMGVVDMNTLAARSNITGVSPV  
LHPTAFMPMTTWDGNSHERLPTAAPSATVMPDPLSAFLACQSQPMTMDAYSRMASMY  
QQLHQQSPASNSKS

>MdPIF1

MNGCVPDFEMDDDYSLPTSSALNRPRKSTMPEDDVMELLWQNGQVVMQNQNQRSVN  
SKRSHQSKYDVVLPDDGXGITRPAQPPQAQNPFLFVQEDEMASWLQYPLVDDPFSAD  
LLYPDSTTSELRLQVSAAPPASRLPIHTPRRTEVQNFLHFARPNNNNASSNRPMIKEMXPS  
GSKKSVVRETMTVVDSSDTXLVGPSSRALDSRPDGAGGGLANGATSFPTTATAGTSFPAKE  
VCEMSLTSSPGGSSASASASAEPMSAXKPPPTAXNRKRKGREVAADDAEIQSEDVEFESA  
NGKKQVRGSTSSTKRSRAAEVHNLSEISVQRRRDRINEKMKALQELIPRCNKSDKASML

DEAIEYLKSLQLQVQMVSMGCGMVPMMFPGVQQMMSMPMGMGIGMGMGMGMEMA  
GINRPMMPFPNVISGSPMPTAAAHMGPRFPIPPFHMQPIPASDPTRVPAVNQTDHMVNSLG  
AQNPNQSRMPNFADPYQQFFGPQQMQLPLQQNQAMPQPTTGKPSSSRGPETHENHQSEW  
ACSCYVVTLTRWILRHSLWLKTRRSKIVLEXDISRCILKDMEGDGDRSFWVSFAFRKSRR  
AIAGKDEQKVEDRILKVLESFREMCLKLRISDVPKIRHIALTT

>MdPIF3

MPLSELYRMAGRVDNSQDFENDFLELVWENGQVMMQGGSSRTRKNPSFNNPKNRDRDV  
GNGNIGKTGKFGSVLDLDEIPLSVPSSEMGLSEDDMLPWLNYSIDEPLHHEXCHDFLP  
EFSSATANEASTNHNLASIDKRSSSSQVFRDSNSNSAHEGACLQQXNVGKVPLNGGADAS  
RPRSGATQLYSLSSQRSQASFPSFRSRVSDTAGDNTSSATHRGVGNSTQISSAGGSPXMKI  
LRPDPVTPSNNNPSIVNFSHFSRPAALVKANVQTNGVMAGSGSSSMIRIANKDKFSAATXN  
NLPESMPIDSSSSAXKESNSQCQQLVRSSVELKPTAKPLEEPCTAKQSEGTCQEETSKDD  
INSNHIPCESAVRVSPNGEKTVEPVVASSVCSGNSVERGSDDPTQALKRKRFRETDESECHS  
DDVEEEYMGVKKGDHARGMGSKRSRAAEVHNLSERRRRDRINEKMRALQELIPNCNKV  
DKASMLDEAIEYLKTLQLQVQMMMSGAGMYMPPMMLPPGMQHMHGPCMAHFSPMGV  
GMGMGMGLGMGFGMGMPDMNGASSSYPMQLQVPPMQGAHFGSHMAGHTAFNGMMG  
SNLQMFGLPSQGVVPMQRAPLAPSSAGPFVKSSAGLNAGSSGGPVENVESAPVSGSKDS  
VQNMNSQAMQNSNANSSMNQTSSQGQATNEGFGQSALVRNNVQVTDVNNXRANG

>MdSPATULA-like

MGDTYECDHYYKNATCSSSPPAAPPHSAADDMSLFLQQILVRSSTSLASGKAPQSLFSSSP  
SVGALLPGNLDRPCHSGFLGDGIPAVDSFAAFVSGHPNEASENEADEDCESEEGLAFAVE  
ARPGGGRSSSKRSRAAEVHNLSEKRRRRSRINEKMKALQNLIPNSNKTDKASMLDEAIEYL  
KQLQLQVQMLSMRNGMSLHPLYLPGTLQPVLQSLQMRMELGEENRPLHLDMTGTLHMNL  
ESSTQNLFNLSNQCTAANESYVPDMSNVVNSETSFVLEPSIQSHLGPFLPASSQEICRDDL  
LQHQQIDVNHSEMNLSTATVSLPFAQVSDPKSTFDTCTIGRDRQEVGLLRISIEQNFHIDRC  
LGIFELS

>MdPIF4

MDTKSNACIDKLQVSCPPSSPHNLTHTKRGGERKRSFAHNSSLELILNFCLLRDMNSCIP  
EGNFEADLPLTNQKKSMGPDHELVELLWRNGQVVLNSQTHRKPSLNPNDQPRQVQKHD  
QQSIRSGGLYGNSSGLIQDDDTVSLIHYPLEDSFDKEFCSHFFSELHSCGPIELDKPIKQFEG  
DKFDASDTGRLVSNPQPNVKSSAGVEYPANPMPPRYHYINSTDQPNQNRGLGKIVNFA  
QFATPGKLSAGSSRGQLGGKEAGDLAQAEVRECSVMTVGSSYAGSNQVLNELDVSRASS  
NCDGTTGLSAGHFYDNVHKIMPQSETGKTDLTQTLTSSSGSGSSFGRGGKQSNVVNSN  
KRKVRDAEDSECQSEAAELESASAAGSKSAHRSGSTRRSRAAEVHNLSERRRRDRINEK  
MRALQELIPHSNKTDKASMLDEAIEYLKSLQMQQLQVIWMGSGMAXMMFPGVQHYISQM  
GMGPPALPAMHNPVRLPRHPLVDQCMNVAPAPNQTVMCQPPVLNPVDYHNQVQNPSFQ  
EQYARLMNFHHMQTMSQPMNMFRTGSRPVQQNNQMMAANGVSSGPFVGAATNDPLS  
GRMIQRLISVQECKNLTPDN

>GsPIL13

MNNSIPGWDFESDTCLTNQRKLIGPDQELVELLWKNQVVMHNQTHRKTLGNSSNLRQV  
QKSDQSVLRSSGPYGNSSNLDQEDAAPWVQFPLEDPLEQDFCSNLLSELPTCEFESYKPIR  
QLEEEKFAKFFASGTPHHPTSSSQPLPPNMKPSCIQGLQGNPIPMAPRFHGPDSQKIHD  
GASRKVLNFPQFSTPRNNVPSAPGITQFREKTTANMSQSEAREYSVITVGSSHCGSNHIPQE  
QDVSRISSGTGVWATTNNNTLSAEPEAVRDYVQRPICPKSGQGKSEMIELTVTSSSGSGGST

GIGRTC SLSTRDHGQKRKGTEEEALEEQSEDTLKSADGNKASQRTSRNRNRAAEVHNQ  
SERRRRDRINEKMRTLQQLIPNSNKTDKASMLEEAIEYLKSLQFQLQVMWMGGGMTPVM  
FPGIQHYMSQMGMGMGAPSLPSIHNPMLPKVPHDQAMSVLQIPNQNLQMCQNPVLGAF  
NYQNQMNPCLPEQYARYMGYHLMQNASQPMNVFQYGSQAVQHSQTMIAPGNNSSGP  
MSGTANIDDADSGKAGSSTFN

>AhPIF3

MPFYELYRLSREKLDEEINGTRATDQSQSSSPEKDFFELIWENGNIILTTQGSRAKKSPPR  
RSLPSHCLPSHSPKGRDRDAGYVNNRVRGKSGDLDTGLNEISMSPSTEVLDLGHDDVIP  
WLDYTMDSGLQNEYGSNFLHELSGVTDQDLPSNHFSLVDKSSGNQVFRDSHKNSAEQSN  
FSSVSSTGVDETTRPKASTVESYLPSSFISVRPRVSGVTANDTSNAMLHPPVTEIPSSSSDFS  
SLKMQKQDQVIPSNGSSVMNFSHFARPAIIVRANLQNLGLKSVSSSTRSENVESMNKGAV  
VPSSNLPESTLADSCSECPKVLGMGNEKAVEQSRDDLKLLLESKSLEQNIAGSKQLDPTCKE  
KAIKIDQTSNRALGETATNTQIAVERSTELVVASSSVGSGNCADRGSDDPQNLKRKNRDT  
EDSEWHSDVEEESVGKKAAGRGASGSKRSRAAEVHNLSEERRRRDRINEKMRLAQE  
LIPNCNKVDKASMLDEAIEYLKTLQLQVQMMSMGAGLYMHPMMLPHGMQMHAPHLA  
PFSPMAYGMQMGLGMGYGMAMPDMNGVSSRFPMVQVPQMVGTHVPAQMSGATAMV  
RSNTQGFQVPGQGFPLPLPRAPLFPFSGGPVMNSSSALGLRPCGATGLSQTADLASTSGLK  
DPSPNTDSLQKSTGGGGCDSTSQMPTQCEAAPTVGFQSPMVHNSSTSEANDSGTLNP  
DKEDNNLVTGYDD

>AtPIF3

MPLFELFRLTKAKLESAQDRNPSPVDEVVELVWENGQISTQSQSSRSRNIPPPQANSSRAR  
EIGNGSKTTMVDEIPMSVPSLMTGLSQDDDFVPWLNHHPSLDGYCSDFLRDVSSPVTVNE  
QESDMAVNQTAFLPFQRRKDGNESAPAASSSQYNGFQSHSLYGSDRARDLPSQQTNPDRF  
TQTQEPLITSNKPSLVNFSHFLRPATFAKTTNNNLHDTKEKSPQSPNVFQTRVLGAKDSED  
KVLNESVASATPKDNQKACLISEDSCRKDQSEKAVVCSSVGSGNSLDGPSESPSLSLKRK  
HSNIQDIDCHSEDVEEESGDGRKEAGPSRTGLGSKRSRAAEVHNLSEERRRRDRINEKMRA  
LQELIPNCNKVDKASMLDEAIEYLKSLQLQVQIMSMASGYLPPAVMFPPGMGHYPAAA  
AAMAMGMGMPYAMGLPDLRGGSSVNHGPQFQVSGMQQQPVAMGIPRVSGGGIFAGSS  
TIGNGSTRDLGSKDQTTNNNSNLKPIKRKQGSSDQFCGSS

>AtPIF1

MHHFVPDFDTDDDYVNNHNSSLNHLPRKSITTMGEDDDLMELLWQNGQVVVQNQRLHT  
KKPSSSPKLLPSMDPQQQPSSDQNLFIQEDEMSTWLHYPLRDDDFCSDLLFSAAPTATAT  
ATVSQVTAARPPVSSTNESRPPVRNFMNFSRLRGDFNNGRGGESGPLLSKAVVRESTQVSP  
SATPSAAASEGLTRRTDGTDSAVAGGGAYNRKGKAVAMTAPAIEITGTSSSVSKSEIEPE  
KTNVDDRKRKEREATTTDETESRSEETKQARVSTTSTKRSRAAEVHNLSEKRRDRINER  
MKALQELIPRCNKSDKASMLDEAIEYMKSLQLQIQMMSMGCGMMPMMYPGMQQYMP  
HMAMGMGMNQPIPPPSFMPFPNMLAAQRPLPTQTHMAGSGPQYPVHASDPSRVFVPNQ  
QYDPTSGQPYPAGYTDQYQFRGLHPTQPPQFQNQATSYPSSSRVSSSKESEDHGNHTTG

>AtPIL1

MEAKPLASSSSEPNNMISPSNPKLKDDEYMELCENGQILAKIRRPKNNGSFQKQRRQS  
LLDLYETEYSEGFKKNILGDTQVVPVSQSKPQQDKETNEQMNNNKKKLKSSKIEFERN  
VSKSNKCVESSTLIDVSAKGPKNVEVTTAPPDEQSAAVGRSTELYFASSSKFSRGTSRDLSC  
CSLKRKYGDIEEEESTYLSNNSDDESDDAKTQVHARTRKPVTKRKRSTEVHKLKERKRRD  
EFNKKMRALQDLLPNCYKDDKASLLDEAIKYMRTLQLQVQMMSMGNGLIRPPTMLPMG

HYSPMGLGMHMGAAATPTSIPQFLPMNVQATGFPGMNNAPPQMLSFLNHPSGLIPNTPIFS  
PLENC SQPFVVPSCVSQTQATSFTQFPKSASASNLEDAMQYRG SNGFSYYRSPN

>AtPIF5

MEQVFADWNFEDNFHMSTNKR SIRPEDELVELLWRDGQVVLQS QARREPSVQVQTHKQE  
TLRKPN NIFLDNQETVQKPNYAALDDQETVSWIQYPPDDVIDPFESEFSSHFFSSIDHLGGP  
EKPR TIEETVKHEAQAMAPPKFRSSVITVGPSHCGSNQSTNIHQATTLPVSM SDRSKNVEE  
RLDTSSGGSSGCSYGRNNKETVSGTSVTIDRKRKHVMDADQESVSQSDIGLTSTDDQTMG  
NKSSQRSGSTRRSRAAEVHNLSE RRRRRDRINERMKALQELIPHCSRTDKASILDEAIDYLK  
SLQMQLQVMWMGSGMAAAAAAASPM MFPGVQSSPYINQMAMQSQMQLSQFPVMNR  
SAPQNH PGLVCQNPVQLQLQAQNQILSEQLARYMGGIPQMPPAGNQTVQQQ PADMLGFG  
SPAGPQSQLSAPAT TDSLHMGKIG

>AtPIF6

MELVFENGQILAKGQRSNVSLHNQRTKSIM DLYEAEYNEDFMKSIHGGGGAITNLGDTQ  
VVPQSHVAAA HETNMLESNKHVDDSETLKASSSKRMMVDYHNRKKIKFIPPDEQSVVAD  
RSFKLGFDTSSVGFTEDSEGSMYLSSSLDD ESDDARPQVPARTRKALVKRKRNAEAYNSP  
ERNQRNDINKKMRTLQNL LPNSHKDDNESMLDEAINYMTNLQLQVQMMTMGNRFVTPS  
MMMPLGP NYSQMGLAMGVGMQMGEQQFLPAHVLGAGLP GINDSADMLRFLNHPGLMP  
MQNSAPFIPTENCSPQSVPPSCAAFPN QIPNPNSLSNLDGATLHKKS RKTNR

>AtPIF8

MSQCVPNCHIDDT PAAATTTVRSTTAADIPILDYEAELTWENGQLGLHGLGPPRV TASST  
KYSTGAGGTLESIVDQATRLPNPKPTDELVPWFHHRSSRAAMAMDALVPCSNLVHEQQS  
KPGGVGSTRVGSCSDGR TMGGGKRARVAPEWSGGGSQRLTMDTYDVGFTSTSMGSHDN  
TIDDHDSVCHSRPQMEDEEEKKAGGKSSVSTKRSRAAAIHNQSERKRRDKINQRMKTLQ  
KLVPNSSKTDKASMLDEVIEYLKQLQAQVSMMSRMNMPSMMLPMAMQQQQQLQMSL  
MSNPMGLGMGMGMPGLGLLDLNSMNRAAASAPNIHANMMPNPFLPMNCPSWDASSND  
SRFQSPLIPDPMSAFLACSTQPTTMEAYS RMATLYQQMQQQQLPPPSNPK

>AtPIF7

MSNYGVKELTWENGQLTVHGLGDEVEPTTSNNPIWTQSLNGCETLESVVHQAALQQPSK  
FQLQSPNGPNHNYESKD GSCSRKRGYPQEMDRWFAVQEESH RVGHSVTASASGTNMSWA  
SFESGRSLKTARTGDRDYFRSGSETQDTEGDEQETRGEAGRSNGRRGRAAAIHNESERRR  
RDRINQRMRTLQKLLPTASKADKVSILDDVIEHLKQLQAQVQFMSLRANLPQQMMIPQLP  
PPQSVLSIQHQQQQQQQQQQQQQQQQQQFQMSLLATMARMGMGGGGNGYGGLVPPPPPP  
PMMVPPMGNRDCTNGSSATLSDPYSAFFAQTMNMDLYNKMAAAIYRQQSDQTTKVNIG  
MPSSSSNHEKRD

>AtPIF4

MEHQGWSFEENYSLSTNRRSIRPQDELVELLWRDGQVVLQS QTHREQTQTQKQDHHEEA  
LRSSTFLEDQETVSWIQYPPDEDPFEPDDFSSHFFSTMDPLQRPTSETVKPKSSPEPPQVMV  
KPKACPDPPPQVMPPPKFRLTNSSSGIRETEMEQYSVTTVGPSHCGSNPSQNDLDVSM SHD  
RSKNIEEKLNP NASSSSGGSSGCSFGKDIKEMASGR CITTDRKRKRINHTDESVSLSDAIGN  
KSNQRSGSNRRSRAAEVHNLSE RRRRRDRINERMKALQELIPHCSKTDKASILDEAIDYLS  
LQLQLQVMWMGSGMAAAAASAPMMFPGVQPQQFIRQIQSPVQLPRFPVMDQSAIQNNP  
GLVCQNPVQNQIISDRFARYIGGFPHMQAATQM QPMEMLRFS SPAGQQSQQPSSVPTKTT  
DGSRLDH

>AtHFR1

MSNNQAFMELGWRNDVGSLAVKDQGMMSERARSDEDRLINGLKWGYGYFDHDQTDN  
YLQIVPEIHKEVENAKEDLLVVVPDEHSETDDHHHIKDFSERSDHRFYLRNKHENPKKRRI  
QVLSSDDESEEFTRVPSVTRKGSKRRRRDEKMSNMKMRKLQQLVPNCHKTDKVSVDKT  
IEYMKNLQLQLQMMSTVGVNPFYFLPATLGFGMHNMMLTAMASAHGLNPANHMMPSPPLIP  
ALNWPLPPFTNISFPHSSSQSLFLTSSPASSPQSLHGLVPYFSPFLDFSSHAMRRL

>AtSPATULA

MISQREEREKKQRVMGDKKLISSSSSSVYDTRINHHLHHPSSSDEISQFLRHIFDRSSPL  
PSYYSPATTTTASLIGVHGSGDPHADNSRSLVSHPPSDSVLMSKRVGDFSEVLIGGGSGS  
AAACFGFSGGGNNNNVQGNSSGTRVSSSSVGASGNETDEYDCESEEGGEAVVDEAPSSKS  
GPSSRSSSKRCRAAEVHNLSEKRRRSRINEKMKALQSLIPNSNKTDKASMLDEAIEYLKQL  
QLQVQMLTMRNGINLHPLCLPGTTLHPLQLSQIRPPEATNDPLLNHTNQFASTSNAPEMIN  
TVASSYALEPSIRSHFGPFLLTSPVEMSREGGLTHPRLNIGHSNANITGEQALFDGQPDLK  
DRIT

>AtALC

MGDSVDGDRLPPSSSDELSSFLRQILSRTPTAQSSPPKSTNVSSAETFFPSVSGGAVSSVG  
YGVSETGQDKYAFEHKRSGAKQRNSLKRNIQAQFHNLSEKKRRSKINEKMKALQKLIPNS  
NKTDKASMLDEAIEYLKQLQLQVQTLAVMNGLGLNPMRLPQVPPPTHTRINETLEQDLN  
LETLAAPHSLPAKTSQGMCFSTATLL

>AtbHLH127

MMIISSQILLFFGFKLFFETRGEDDIVELLCKIGQTQIPSSDPLPILRGSGSGGREENTPLPPPL  
PHQNLFIQEDEMSSWPHHPLRQDYLCSELYASTPAPHPQSSVSLAPPPPKPPSSAPYGQIIAP  
RSAPRIQGTEEARGSTSRKRSRAAEMHNLAEERRRREKINERMKTLQQLIPRCNKSTKVSM  
LEDVIEYVKSLEMQINQFMPHMAMGMNQPPAYIPFPSQAHMAGVGPSYPPPRYPFNIQT  
DPSRVWLQSPQPNPVSNQPMNPYGQFVGHQMQQSLPPPLQVILSQYPLCLFLCSNK

>AtbHLH23

MTWPKMLILSHDLISPEKYIMGEDDIVELLGKSSQVVTSSQTQTPSCDPPLILRGSGSGD  
GEGNGPLPQPPPLYHQQSLFIQEDEMASWLHQPNRQDYLYSQLLYSGVASTHPQSLASLE  
PPPPRAQYILAADRPTGHILAERRAENFMNISRQRGNIFLGGVEAVPSNSTLLSSATESIPA  
THGTESRATVTGGVSRTFAVPGLGPRGKAVAIETAGTQSWGLCKAETEPVQRQPATETDIT  
DERKRKTREETNVENQGTEEARSTSSKRSRAAIMHKLSERRRRQKINEMMKALQELLP  
RCTKTDRSSMLDDVIEYVKSLSQSIQMFSGHVMIPPMYAGNIQQQYMPHMAMGMN  
RPPAFIPFPRQAHMAEGVGPVDLFRENEETEQETMSLLLREDKRTKQKMFS

>AtbHLH119

MGEDDIVELLWNGQVVRTSQPQRPSSGKPSPTPPILRGSGSGSGEENAPLPLPLQPPRPLH  
HQNLFIREEEMSSWLHYSYTGVTSTPATHPQSSVSLPPPPPIAPSEDDVVELLWKSQVQVQ  
SIQTQRPIPPPIFRGSGSGGGEETVLPPLPPLHPSHQNIFIQEDEMASWLYHPLRQDYFSSGVA  
STSATRPQSSASLAPTPPPPSVPYGPQIPVERRTENFMNFLRLRGNIFSGGRVEAGPVVISTQ  
IGSSATPSSAAESCVIPATHGTESRAAAITGVSRTFAVPGLGRRGKEVATETAGTSYSGVVK  
AETERVQIQPERETKITEDKKREETIAEIQGTEEAHGTSRKRSAADMHNLSERRRRERIN  
ERMKTLQELLPRCRKTDKVSMLLEDVIEYVKSLSQSIQMFSGHVMIPPMYAGNIQQQYMPHMAMGMN  
FMPHMAMGMKGMNRPPPFVFPKGTFPRPGHMAGVGPSYPALRYPPFDTQASDLRVHV  
PSLHSNPVPNQPRFPAYINPYSQFVGLHQMQQPPLPLQGQPTSQPSFSHASTSK

>AtbHLH56

MQFDESARVWIWFEIRREDDIVELLWQSGQVVGVTNQTHRQSYDPPPIILRGSGSGRGEEN

APLSQPPPHLHQQNLFIQEGEMYSWLHHSYRQNYFCSELLNSTPATHPQSSISLAPRQTIAT  
RRAENFMNFSWLRGNIFTGGRVDEAGPSFSVVRESMQVGSNTTPSSSATESCVIPATEGT  
ASRVSGTLAAHDLGRKGKAVAVEAAGTPSSGVCKAETEPVQIQPATESKCLKAREETHGTEE  
ARGSTSRKRSRTAEMHNLAERRRREKINEKMKTLQQLIPRCNKSTKVSTLDDAIEYVKSL  
QSQIQMMSTGQGMMSPMMNAGNTQQFMPHMAMDMNRPPPFIPFGTSFPMPAQMAGV  
GPSYPAPRYPFPNIQTFDPSRVRLPSPQPNPVSNQPQFPAYMNPYSQFAGPHQLQQPPPPPFQ  
GQTTSQLSSGQASSSKEPEDQENQPTA

>CsSPATULA2

MIVMADMYNIACSSSSSPPEPDDISLFLHQFLLRSSSSSSPPSSYSLMPHKPNPMHSSSPFHT  
LPENPNRSIPPSLLSGSERRVSAVDSSSGGFFPVNATNVSCSSAGTLDNDPPDEYDFESEEGF  
EALVGDVPAKPVPPRTPSKRSRAAEAHNLSEKRRRSRINEKCLKALQKLIPNSNKTDKASML  
DEAIDYLLKQLQLQVQEHSGSASNEFSVILKALVMLTMRNGFSQYPMCQPGVLEPAQLSQ  
MKMGFYEGNELLHMNEAGMLPENQDAPTNLSLVNISNQSANSAQPSVAAFSSIIINSETSFG  
MDSSIQGHLPFQLHTSSEENCREDIIHHLRFDNVKENCREDIHHQQENVDHSDTKFLGG  
NRAGDGGGSGLAMMIELAMMLVVELNGSGNETCL

>CsSPATULA3

MADLYGTNARSSSSLESEELPSFLHNLLYNLSASPISSCSTVKDKHRQSFLSPPPPETITSSSAT  
NLFYRLPMFSDSDSRFRERASTAGSSMMVDSSVDFNFSYPGRGFMADAREFTRNTFSAAC  
VVDSGDITSSLKRKFAEENDFDDFGSDCKKGSASEAPVSPGLPRSSKRSRAAERRRSRIN  
EKMKALQNLIPNSNKTDKASMLDEAIEYLLKQLQLQVQMLSMRNGLSLHPFCFPGSLHPT  
QLPQAGIRFSEGNEVLNTNGGADTFPRNQEISMQAAFDLPNQCTPSNQPNLLTPTTNISNSE  
TPFELDPSIQNHCAPFNHLTSSKVITLL

>CsPIF7b

MKGIMNQCIVHNWNPRHQRQEVEGEEKTSSHVHSHLHNLTTPHIVPIVLSSTSHKYV  
VAFLDIFADRAPTLQNKSRIRVRHTVHKFRSNFEVTELTWENGQLAMHGLGGLLPTAPTKP  
TWGRTGDTLESIVHLAACHQQNLNLLPPHDHLHHHNPAPNRTTSSAKKCAETVGHMPMS  
PGFSKKRMWSESEKKFASGIQDDRSACASATIFKDSGTTMMTWASFESPPQSLKTKTTDE  
DSACNGESENQDEEREMKGETGRSHSTRRCRAAAVHNQSERRRRDRINQKMKALQKLVP  
NASKTDKASMLDEVIAYLLKQLQAQVQMMSSARNMPQQMMMLPLGMQQHIHMSLLARM  
GLGVGLGLGMGPMGMLDMSTVARPQSLSPLLHPGTVAAAVTAGPTFVPPPFVLPPMMPS  
HTQAQATSDAAINNSVPFNPNPYCAFLAQSMNMDLYNKMAAIIYHQQVNQTTQPTSKPLPS  
SHVQGG

>CsPIF3b

MPFSEFYGMASGKLESAQQKTTTCLTDLSHVPHNEFVELVWENGQIMMQGQSSRARRSS  
TTNNLQSQTPKLQDKDLVKMDSVLNYFTTESPSGEMGLGQDDDTVPWLNFPISDSLQHD  
YYSELLPELSSVTVNENSCNQSIRGSHSVSLGNDLSLEQANASEVRSSEIEESSRARSQGFH  
DPWLFQENQTSIPSLRSKVSGIISNTSCNNKRDAIIVQPNLSRRPNTSSSFMMNFPHFSRPSTL  
VRANLQTIDAITSPTGSNVEPMGGKNKGNPCSGYFAQSALFDFSSGLRKEMGTHSQPNL  
DSEPVMARLEESRTAEQSNPVCREDAAKNVELPNQVRGEKTTEPVVASSSACSGNSAER  
ASNETHNLKRKCESENDDSEGRSEDVEEESVGVRKAAPARGGTTSKRGRAAEVHNLSERR  
RRDRINEKMRALQELIPNCNKVDKASMLDEAIEYLLKTLQLQVQIMSMGTGLYMPPMMLP  
TGMQHVHAAQMACFSPMAVGMGMRMGIGMGMLDMNGGSPACSMIQVPPTQGTFLSTP  
RPPPYSGPTNSQGMAGSNLHIFGHPSQGFSMSAPRRQLAPLSGGPRPPINSAMGVNANVE  
GPNSAPLANSKDLIQNTNSQMMHNADASS

MADMYNYKTTCCSSSSFPSEPDDISLFLHQMLLRSSSSSSSSPMQTTPHRPIPTSLLSGFERPT  
THPISAAESSSGLNDPDEYDCSEEGFEALVEEGLAKAITPRNSSKRSRAAEVHNLSEKRR  
RRRINEKMKALQNLIPNSNKTDKASMLDEAIEYLYKQLQLQVQMLTMRNGLSLYPMCLPG  
VLQPAQLSDIKMSFYEGNGTLNMDMTGMLPVNQETPTNTLNFIPNQSTNPSELAAANLSII  
NSGTSFGMDSSIQGHLPFQPHTSSKVKEICREDMLLPCQHNLVDDHSQMNSLDFEMGTK  
ATVSIPLAQASDVKDNALEAFILRTERPESLLSNLGHNPVLAPPFESDTVSNMNLMMCTQ  
MP

MSQCVPSWMDENHTPPTLTLRAHSNRNSSCPDVPLLDYEVTETLWKNGQLAMHGLGPP  
RVPNKLPVAAAKYTWEKPRAGGTLESIVDQATTTCFPHPKTTAAASDLVPWFDHRAASAA  
AVTMDALVPCSTAGAAQEGISTCVIGRSTRVGSYSEVEEEEKKKRARVAHVQEWSSRDNS  
DRRQLAIDTCERELGARGLTSTSLENTSSGKHWTKATAGDDHDSVSHSRSQIAAGEEENK  
KKPTGKSSISTKRCRAAAVHNQSERKRRDKINQRMKTLQKMVPNSSKTDKASMLDEVIE  
YLKVLQAQVQMMSRMSMPMPMSMMFPMALQQQLQLSMMAPMGMGMDMNTIGRPNAA  
GIPPILHPTAAFMLPTSWDGIGDRLVPHPTVMPDPMATFLSCQSQPMNMEAYNRMAALYQ  
QLHQPPPPPPPPKNN

MSEWIVSNWNKRQQQRQEQQGVEEGEEGNRSSHVHNNSPRSTHHVLVPPKSTYEVAEL  
TWENGQLAMHGLGGLLPTTPTKPTGGRSGDTLESIVHQATYHKQNPVVPQHDPPTADIS  
STGASFVGKWAEISACARTAPILVGKQMRSEQYGNFSSSIIQEPTDRSACASPSATFC  
KDNDATMATWASFESPSSLKTKTTDEDSACQDRSENLEERETKCETVRSLSRRSRAAA  
NHNQSERRRRDRINQKMKALQRLVPNSSKTDKASMLDEVIEYLKQLQAQVHMMSSARN  
MPQMMMPLAMQQHIQMSLLARMGMGVGLGGLIHPPPVASVTPTFVPPPFMMPPMIPTRA  
QAPPTPDATVSNNSVPPDPYCTFLAQQSMNMDLYNKMAALYRQQVNQTTQPTSIPLSS  
HVQGG

MPLSEFYRMARGSLESAQPKTMALSTDRSHGPDNELVELVWENGQIMMQGQSSRARRNS  
TNNFQSQTPKHRGKDLGNANNLKMGRFGVMDSVLDDFATEVQLGEMGLEQDDDMVP  
WLSYPIDDSLQHDYCSELLPELSGVTVNELSSQNSFASMDKRNSGNQTIRGSHLSLEQANA  
PKVSSLEVGESLRSRSGQFNPWSFHESQTLDPSTLTSVSSIISNNASNTKHGVCGDSIQAQA  
SGLPNIKTQKQDSGLPNTNASIMNFSHFSRPAALVRANLQNVGAMATPGTSGTEVMAGKN  
KGTAPSTGNLADSALLDLSSGLRNEMGSLNQRNLVPPKVDKSVAAALEDSTTGQSEAV  
CREDVVKNDKSPKQILGSTAKTVEPVVASSSVCSGNSAERASNDPNPTHNLKRKCHETDD  
SEGRSEDVEEESVGIRKAAPARGGAGSKRSRAAEVHNLSERRRRDRINEKMRLQELIPN  
CNKVDKASMLDEAIEYLKTLQLQVQIMSMGAGLYMPPMMLPPGMQHVHPAHMAHFSP  
MSVGMGMGMGMGMGMGMGMGMGMMDMNGGSTMCPMIQMPHVQGHFAPRPPPIISG  
PASFHGMVGPNLQAFGHLGQGLAMSAPRAPLVPFSGGPPINSAVELNASGVAAPVEVPNS  
APSSNSKDLREHTNNTDASCPMNQTSQGQCQAKNEGFEQCSVVLKNDQPQDVGSSSEDVNL  
TKENDIVPGSKWR

MTVVVVEYGYRLDYEVAELTWENGQLAMHGLGTPRPVNPKPPTSSATTTKYTWEEKPRA  
GGTLESIVNQATCCPIFKPSIGSGTMNEDLVPWFDHHHRAAAASATATMTMDALVPCSTR  
AKDSTHVLKRTSNSTCMVGSATPVGSCSGANTFENNGGDCGGGVMKRARVAARVPVA



AVEWSSRDNSVSGGSVSRQLTTIDTGERELDVCGFTSTSMGSPENTSSAKQCTKATTTTAD  
DHDSVCHSRPQKRRDKINQRMRTLQKMVPNSSKTDKASMLDEVIEYLKQLQAQVQMMS  
RMNMSSMMMPMTLQQQLQLSMMAPMGMGMGIGMGMGMGVMDMNTISRSNIAGIPPL  
LHPTAFMPLPSWDGTGDRLSAPATVIPDPMSAFLACQPQPMTMDAYTRMAALFQQQHQP  
PSTSKT

>CsPIF1

MQINDRFLNLDFNCGINSEIHAAMNNCVPDFEMDEDYSIPTSSGLTRPKKSLMAEEEIMEL  
LWQNGQVVMQSQNQRSIKRSDIGDAVTPAEQSAARDIRPEEESTTQLFMQEDEMASWLN  
YPNDDSSFYRDFYADLVYPAPTSPVDPLAHTTPIPELKIPPPSEAAAISRPPPIAPPKRAELEHS  
ARFQNFVHFWRTKGTEPGPSISNKAVRESTVVDSSETPAAAAQESRASHFAGCAKPAQISG  
VNVGCGSMRGGGATAAGTTSSGGREIRTCDLTLTSSPGGSGASMSASAEPVSKPPPTTTM  
TTEDRKRKGREVDDETCQSEVSHISFHL PQDVYPDAKKQVRGSTSTKRSRAAERRRDRIN  
EKMKALQELIPRCNKMMSMGCSMVPLMFPGVQQYMPPMGMGMGMGMGMGMGMMEM  
GMSRPMMPFPSVLAGSALPTRAAASHLAPRFPVPAFHMPPLPVHDP SRIQVPSQTQPMLN  
HDPNQPRMPSFPDPYQQYLGFHHTQVPMPQNQQMMQPSSSKPSSSREVENHENLHSGPL  
VYIYIKFSFSVVFVAVEFIPPRDGYGFSGPGE
