# Supplementary material for: Identification, Molecular Characteristic, and Expression Analysis of PIFs Related to Chlorophyll Metabolism in Tea Plant (Camellia sinensis)
Source: MDPI journal article supplement (doi:10.3390/ijms222010949), 2021-10-11
Supplement: s1 [file s1]

**Text S2 Promoter sequences of structural genes in chlorophyll metabolic pathway**  
DNA-binding sites of PIF transcription factors were marked by red letters and underscores.

>TEA026253.1 *CsHEMA* [flank5:2000]

TTGAAATAGAAATTAATGAGGATTAATTCAAGCTAAAGCCTGCCTCATATGG  
AAACCTAATTCTAAAAACAAAGAAAGTACTATTTGGCTTTTCAAATCAGTAT  
ATCAGCTGGACATCTGTTTTGGTTTGTGCTTCATTGCTAATATTAATGCAAGT  
GTGAACATAAAAAGAAACAAAATAATTATATGTATAATGCAGCTAATCAATC  
TACTTGATGAAATCTTTGACAGTAAGGCAAGGATGTCGGATCTTGTTTTCGA  
TATTTGGAATTGCCTGCTCCTGAAGTTCTGAAACAAGTTGGAGGCCTTTGG  
TGGATGTATACATACATTACACCTTGCATTATTCTATGAACTTTTAATTTAAAA  
AAAAAAGAACTTTCTTTTTTATTTTGCTCTTGTTTATCCATCTATGATGCGAT  
AGAGGGCTCAATCACTTTAGTCTAACAATGTTAAGTAACTTAAACTCAAAA  
CAACTATATAACGGCTATTATACGCGATAAAATGTATGGAATTTGTTTTATTTT  
TCATTGAAAATTTTGTCTATTTTACCCTCTCTTTTGATAAAGCTTAGAT  
GACATATAAGCTTGTTTCTATTTATTTTAAATGTTTCTTTGTTAATGTTGATTG  
TGTAAGAACTACTACAGCCTTGAATTAGCTCCATACATACATTGTATGCATA  
TACCACATGTAATTATTGCAATCATGTTATTATTTTCCTTTAGGATTGAGAAG  
AAAAAGCTCATGTCTGATGATTTGTATTTCTATATTGTGGAGATTTTTTGTAT  
TGTCTAATCTAAACTGACTTAGAAGTAGAATTTTTTTTTTTAAAGCCAAAGT  
TATAAACTATAACCAAGAGAAGCTTTGGTTCATTGCTTGCCAAGCAGATAG  
AGATCAAAGCAAAAGAGCAAACACTGCATGTAAAGAAGCCAGTTAAAAA  
ATAAGTAACTAGAAAAGAAAACAACAATGACAGCAACATTGTTCAAACATAT  
ATCATGAAATCCTAATATCATACAATACAAAAATCATATTAATATGGAGAGCA  
TATCCTCTAACTGTAAGTGGGAATCTCTTCCACGGCTATCTCATAAAAGTTG  
TGGCAAAGAGAGGCCCAATGAAAATCTCAAGTAAGCAATCTCCATCACATA  
ICTTCACCCTTCCCCTTTTCCCACCTTATCACTTTCTTTCATTACTTCTCTCTT  
TCACCATCACCTAATTTGTACTATATCTCTTTGTTTGGTGGTGTGATTT  
TATTTATTTATTTATGCATTTCTTTTTATATTTGATGATACAATGAAACACAAA  
AATTAATTTAAAAAAAATCATGATTAATGAAAAACAAGTTTATATTGATTG  
AATATATTTTTTTTATTTTTTAAACTTCACTTTAGTTTATACACTAGATAGATA  
GATAGGTGCCACACACTACGGTGATAGATAGAGAGACAAATAGGTGACATA  
AATAAAATTAATATAATTTTTTAAATTGTTATTATCTTTGTAACAAAATAAAAT  
AAAATTTCAAGCGATCTGTAAAAATTGTATAAATTTTTTGTTTAGTAGTGAA  
AAAATAGGGCCCAGGAGGAAAATTTATGAAGCCCACATTGTAGGCCCAAA  
AGTCAAAATCATTGATGATTCCGATCTACACAATGTGAATAGACCCACCGG  
TGAAGATCTACAGTGGGACCTGAAATTTCTGTGGATAAAACGTGTATTCC  
ATCCGCCAATCAGAACACAAAGAAATCTATCTCTCTCCCTCAATCAGAAAT  
ACTCCTCCTCCTCACCACACCAAACCCACCCCCCAATCTCTCTCCCTACC  
AAATAAAAAAAAAAACAACAAAAACCAAAAAACCCAACACACAAACAGC  
CCCTTTTGCACTGAACTAAACAAAGCCGTTGAACATAAACCTTCCCCCCTC  
TCTTTCTCTCTCCTCCAATTCTCTCTCTCTAGGGTTAGGGTTTGGGAGTGTG  
AGGCGATTCTCGCCGGCGATG

>TEA016019.1 *CsHEME* [flank5:2000]

GATGATGATAGAGTAGCGTAGTGGAAGAGAAGAGGTTGTGGGTTTTGGTTT  
GGCTTTGGGTTTGATCTCCAGAGCTAAGGGCACCTACCAATCATGAGATTT  
GTCGCCGTTTCTTCTTCCCCTTCTTCTTTTGAAAACCCTAGGTTTTCATTTCT  
TTCTCTCTCGTTCGCTCTCTCTTGCGATAGATGGGGTGGTCATGATAGTGGA  
GTGGGTTTGGCAGCACAGTGCTAAATGAATCCTTTTGGTTTCGGTAATACATT  
GCTGAACATAAAGGATTTGTTTCGACTGTTAGGATTTTAGGAAAAGAAAAAG  
AAGAAGAAGAAGAAGAAGATAAGGATGAGGATGGGAATGGGAGAATGAT  
AGAGTTCCAAAAATGAAATGGTGATGCTAACTGGTTGGAGTTGTAGAAGTG  
AAGTGGGGGAAAGATGGTGCCATATGAGACTGGCACTTCGAGAGATGCTG  
ACGCCGATGTTGGGTTGACCGGTGTTAGTGGGGATGTAATTAGGGTTAGGG  
TTTGGGATTAGGGGTATAGTTGATATTAAGGTGAAGGTTCAAAGGGCTTTAT  
TTTGCTAGGTAGGGGTTCAAAGAAGTAGGGGGGCCAAAATAAAGAGGTGG  
GCAATAATAGGGGAAATTATATTTGCACACACCTAATTACCTCAATGCAT  
ACACTTAATGAAATATTATTTAATGACAATTATACCTTAACTAAAATGACT  
ATAATGAGCATACACTAGCATCCATAATATTATATGAAAATATTCTTTGTACAT  
ATATTTTAAAAACAAAAAAATCTTAATATACATATTTTGAGTAAAAAAA  
CTAACTCTAATTTTTTTCATTGTAGTTACTTTGTTTGTACACACTTTATACTA  
AAACAATACTTTCATAACAACCTCTCATATTGCTTTAATCTCTAGATTTATACTT  
TATTAATGATGAAAATGTTAATTTTTTTGTGTAAACTTCTTTTTTTCTTTTCG  
CGGTTTTTCAGTTTGACAACCAGTGCCGAATTATTTTCATTATATTGGATATCA  
ACTGTCAAAGTTTTTTTGAACAAATTTGTGCAACTAATCACTTTTATTCG  
GAAGTTAAGTTTCGAATTCAATGTATAATTTTCGGAAAACCAATGCCGAAATT  
TCCAAACCGAAAAACATAAAAAAAATTAATAAAAAAAATGAGGGTTTT  
ATGGCAATGGAGTGTACAGAGATCTGAAAATAATAAATGCAATAATAAAATG  
GAAATATGTCTTATCTTCAACAATATTTTGAAGGGTTTTCAATGGAGGTTCA  
ATAAGGTCTTCAATGGTCTTCACGTGGCCTACAATGGGTCTGCAAATCTC  
GAAGTAGGGTCACTCAACAAGCATGTAAATGAGAGTTAAGTGGTTTGT  
GTACAATGATTATGAGTGAAGGATATAATTGTAACCTCTAATATGTGGAATTGA  
AAACTTAATTAATAATCAAGTTAATAAATATATGTATTGAGAGAAGATATAT  
ACTGAAATAAGGCTCTGTTGCAAGTGACTTTTTTAGCCAAAAAGTCAAA  
AAAGTTACTAAAAAAATCAAAAAGCCAACAACCTTATACCAAAAAGTCAA  
AGATTCTATTTTTTCTCTATTTTTTTTACAGATGTTTTTCATAAAAAGTCAAAA  
ATTATCCCAAACATACTAATTTTTTTTACATCATATTTTATTTAAAAAGCTAAAA  
AATTGTTAAAAATACTTGTTCCTCAACGAGACTTTAAGTGTGTGGAAATAG  
AACCAATAGCAGCCCTCTATATGAAATTATAGAAGAGATAAAAGTGAATTA  
CAAACTTGGCCTCTCTTATCTTCTTTTATCTGTTTGTCCCTACGTCTATCTAT  
CCCCATTCTTTCCAGAAAAAGGCAACCTCCTCCGCCACATACATTTTACA  
AGGGAAGAGATTTGACAGATTTTTTTTGGAGAGAAATGCAAGCAAATCTCA  
GAGTAGAAGAGCTTTAGAACCACTCCAACATC

>TEA018733.1 *CsCHLI* [flank5:2000]

ATTAGGCGATAGCAAAAAGGAATGTGGAAGGGTGGTCTGTGACACTAGA  
CTTAGGGTTGGTAACAATTAGAGTTGGGAAGAGTGGCCGAAGCTGTTAATT

>TEA026812 *CsPOR* [flank5:2000]

TTTTGTTTGT TTTGTTAGAACAGCGAAAAGAAAAGTGGTGGTGGTGTGGTG  
GTGGTTGTGGTGGTGGGGTGGTTGTGATCACAAATGGCAACAATGGTGGTGG  
TAACAATAGTGATTGTGTTAGTAGGAATTTAGTTTTGAAGACATTGAAAAAT  
ATTTTATGCCCTGATTAGTTCAGTTTTTCATTGATTTTCGTTTTTCGTCATATTC  
AAAAAAAAAAAAAATTCAAATAATATTTTCTATCAAAACAAAGGAATTAC

ACTTTGTTGCGCAAGGATAAAAGTTTCTCGCTTTGCTTAACAACCAACTAA  
AGATAAACACTAATCCGTAAGTTTACAAGAAAGTAATTTCTTTTCTTCTTCT  
TCTTCTTTTTTTTTTTTTTTTTTTTTTTGAAGTATAGAAGTAATTTCACTAAATTCA  
AAATCCAAAAATATATTAAAATTAAAAGATAAGAAGGTAATTAGAGCAAGA  
AGATGCAAGCTTTCAAGTGTTAGACCTGGAAAAAAAAAAAAAAAAAATTGGA  
TTATTGGAGGATAGCCATTTTAGAGATAACTAATACAATTGTCTCATAATCAA  
GGCCACATTAGGTCAAAACCATAATCATCACTTCCGTACCATAATCAACACC  
ACTTTGTCTCATAACTAGATGGATCATAAGCCCTACTTGAATTTAATCATGAG  
TAATGTTAGAGATCCCATAACATCTCTTAAATTTTTCTGCATCGATGAAGGTT  
GGTGTCTTAGTTGGTTGATTCCATAACGAATAAACAATTGACATACAACATT  
CCACATCAATAAGGATAAATTTATGGAGTGATGTTATAAAGATCTTAAGCATT  
TTTCACTATTTAAGCAACATGGATGGATTAGTCGACCATTTTTTTTTTCTCTTT  
TTTCTTTTTTAGCATCAACAAAGAATTTTATTAAGAAGAGAGAATAAGGGGG  
GAGGACAAGAATACTCAAAACAAAGAAAAGGAAAACAGTCATAGAAAAC  
AAAACGAAAGCACAACATGCTAGTACTATAGATGGCAAATAGCAGTCCAAT  
CCCTAGAAATCAAGAAAAACAGGATTAGTCGACCATGTTGCCGTCAAGAA  
AGTATTCAGTGATACTGAGGCAATGACTTCTTCATAAACCAACATATTTATG  
GCTTATAAATAACAAGAAATTAAGATGACTGGTCTGAAAGAGACCATGGTT  
TGTTTTTGCGTTGCAAATAAACTGCCAATAATCATAGCAAGCCAGTTTAGCT  
CCTCTCTTTTTCTTAGTTTCTAACCAATATTATTGGATGATTGTGATCGTTCA  
ATCAATCTCTGTTTCTCAAATTTTGACAACATTGCTAAGCAAATAATAGTT  
AATGAAATGACCCTTCTATATGATAAGGTAGGATATATCAGCATCTTTCCAAA  
CTCAAACCTTGGAACACGGTCTACAATATTGTCTCATTATACAAGTTCTGT  
TACATAGTGTTCTTCACCACATCTGCTTTATCAATGTTCAAACCTTATCACAAT  
AACAATTCTTGTTCTCTCTCTTTTTCTTTTTGGTTATAACCAAACCTTCTCAA  
TCCAATCTTTCATAAGCTTAATTGTTTCCGACCATGGGAAATTGTTTTTTGGA  
AAAGTCTTCAAAATCCCAACCAACCAGACGGTATTGCTTCACCTCCCTCTG  
GTTTGCCTTCTTAGCATTTATTTTTTTAATTTTATTTTATTTTAGTTACATATTTAGAC  
ACAAAACCCAATACTAAAATTGCATTTCTCTTAACCTGTTTGATCATTTACTA  
CAAGGAGTCAATGAGTTTAAAGTTTCCCATCAGCAAAACGTTTCTGTATCA  
CTTCAAGTGATGAATTTATCTGTTCTTCAAATAAATGGAAAGGTAACAATT  
TTTTGCATACACTCCGAAATTTTGAACAAATAAATATAGATAATTCATTTTTG  
TTTGATTTCATAGAAGGCGTCGATGAGATTCAAATTTCTCATCCACCAAAAA  
GGTCTAAATCACCACCTTCAAGAGATG

>TEA005094.1 *CsCAO* [flank5:2000]

TAATGATTGAAGTACAACGGCTATAAACGACTATAAATTCAAATGAATACAA  
CGGCTATAAACGACTATAAATTCAAATGAATACAACGGCTATAAGTTTCATT  
ATATATACCAAAGCCTCTAATGTAAACAAGTTTAAAAAAAAAACAGAAATAT  
TCTTTGATCTATAATCACTCACATCTATTCTCTGAAAAATTCTCTAAGAAGTG  
TTTTTAAATTTTTGTTTACATCCTCTCTTAGAAATTATACACTGAACCTTATAG  
CATTAACTCATCTTTCTTGTGTATGGTTTATAGAAAAATCAGAGTTTCATTT  
TTATATATATCTTTGAGAAAAAATTATTGTAGTTTTCTGTGAAAGCAAAAATA  
CCTTCTTTTCAACTTTGTAAAAGTGTAGTACACTCAGTATTCTTGACTTAGA

AAGTCTGTGTAAAATCTGTGGAGGATTGCTCCATCTATGAAAAGGTTGCTA  
GCATCCTGTGAAGCTAGAAGATAGTGGAAAATCTCAAGTG AAGCTTGAGG  
AGTGAATGTAGGCTTGGTTGAAGCCGAACCACTATAAATCTATTTGTCTCCT  
CTTTCCTAATCTCTTTATTTTCTATTACTGCTATATCTATCTAATA TTCATGTT  
CTAATAATTTGATTACCCTGTATATTAGTTATACTTCATTATTATTTTGCTTGA  
TCATTTACTGCTAAGTTCATCATTGTGCTTGTTAATAATTTGTTATACTAGTAG  
TTAATTTTATTGTGTTATTATTAATTTTAATTTTATAGAAACCTAATTCACCCCC  
TCTTAGGTTGCTTTTTGGATAACAATATTGTTTATCAATTTATATTTTGCTGAT  
ATCAACTAACCATTCTTAACATTTAATTAACGGTAGGAGTTAAATTGTTATTC  
GAATATAAATCTCAAGGGGCGGAATGTAATTTCTGAAACCTTAGGGAGGAA  
TTTGTAATTTAGCTACACCTCAAGAGAGGTGTGGTTAATTTGCCCTATATTAT  
TTAGTTATGACTGTAAAATTATATCATTTTCTTCTTGAGTTATAAAA TACATG  
TTTGATCATAGTATTTTCTTAAATGTTTACCAAATGTTCTCACATGAATTTA  
GATTTACAAA CCCAAGTAA AACATTTGGTAATAAGTGTGAGACCTACACC  
TATATGAG GCATTTGATAAAAATTTTATAAAAATGTTGACGTCCTTAAGCTCA  
ATTTGATTAGTTAGATAATATAAGAAAGTGAAAGAAAAAGAAAAAATATA  
ATTTTTTATGTATTTGTTTAAATACAGTCTTAAAAACAATAAAAATTTAAAT  
TTTCTGTACGGGCTAACAATTCATACAAAATATACATAAAAATTTATTTTTT  
CACAAATCTTGACAAAAATTATTTTATTTTATTTTATCTATATTTCTCTACT  
CCCTATTATACCATGATTATATTTATTTTCTATTATTTTATTATAAAATATCTCAT  
CTATTCAAACATACATAAGAAAATAAACTTTTATTTCTTTTCTCTATTTTTAT  
TTTTTTTTTTGAAAAATGTTTCGTAGCTCAAATTTGTGGTTCAAAGTGGC  
TCAAATGGCCAAAACGACGTCGTTTTGGCCATTTTATGTTGTTTGTACTC  
AAAACGATATCGTTTTGGTCATTTGAGTCACTTTTGAACCATAAAATTTGAG  
TTACGTAACATTGTCGTTTTTTTCTAAACAAACGAGCCTCAGCATTTTTCT  
TTTATTTTTTTTGGAGTCCAATTAGTGA CGCACATTC TCTGGGTCCGGACTT  
CTTCCTTCTTCAACTTCGCTTTGTCTGGTTTGTACCGTCTTGGAATCTTCC  
AGAATCACAGATACTACCATTGCAAACCTTGACGCAAACCTACTCTCTCTCTC  
TCTCTCTCTCTGTCTGTGTAGGTCTGCTCAAATTCCTCTCAATCATATCATA  
CACACATTTCAATCCAATATCGAGAATCGAACACCAAGCTGAATCAATG

>TEA003777.1 *CsSGR* [flank5:2000]

TCAGAACCGTGACATTTGAGTCCGAACCATAGTAGCTCAATGAACAAAACG  
GATTTTCGCGCCATTTTCGCGCGCAGAGCCGTGACGTTTGGGCATGTCTACAC  
TTGCAATCGACCTGCCCTTTAGCATAGGCCTTTTGTGCGGCCGCTTGATC  
TTGGCCTCTTTACTCTCCAAGGTGCCCTTTAGCTTTTCTTCGGCTTTGGCGG  
CTTTGACCTTGCTTCCCTTGGAATAGCCTTGCTACCTCGGCCACAGTTTT  
CGCGACCTCAGCCCTCTCCTTGGCCTTACCTTGAGCAGCTATGGTAGCATTG  
GCCTTATCCAACAATCCCCTGATCTTGGCCTCAACCTTGTTGAGGGAGGAC  
AGAAAGCTTGTAGCGTCCTGAGTCTTTTAAACCAACTCCTTCTTCATGGCTT  
CAGCCTTCACTGTGTAAGAGTGAGCATGCTAGATGGCCTAGAAAGAAAAA  
AAGAAACAAGCAAGTTAGTAACATTTCTAAGTGTAAGAGATTTAGACAGAA  
AGTACAAGTGTTGGAGACTTACCAAGACGGAATACTGCATCATTAATACGA  
AGTTCTCATACTCGTTGATCTAGGCCATACATTTTATGTCGACTGGCAAGATA

ACAGCGGTAGAGAGCGCGACACCGACCTTAATACTGTCAATGGCACTGCC  
GCTAGCTGTCATTGGTCGGTCCCCAACTGCGATCGTGGGGGCCTAGGGCTT  
ATCGGCTCAGTAAACAACCTGGGCCCCGCTGCACCTTCGGATCTCGGCTTCTT  
CAATTGTGGTGTGTCGGAGGGCTTGGCCTTAGCAAGCCTCTTTTCGGAGGT  
ATGCTACCATTTTACAGTGTCCGCCAATTTAGAGATTGGCACTGTGTTCTTT  
GAGTCTGAAGGTACTTGAGTTACTGTGGCCTTGGACTTGGCCTTTTTTATTC  
GTTTTTGCTTTGGTTTTGGCTTGGGCTGGGACTTAGAAGGGGAGGACTAAA  
CAGTAACAACGCTTGGAATGTCGGCGAGGAAATCTTCAACTACGGCCTATT  
TGCATCCCATTTCCTTAGCGATTGCAGCAACTATAACGTTGGTGCCAAAGTT  
GATGGCAGGAAGAGCAATGGGAGAGTTTGTGGATCGTAAGCTGACGCCT  
CTGAATCTCGGCGCTTCTAACTTCGGGTTCGATCGGCAGAAACGTTTGGAG  
CTCGACATTGGCATTAGTGTTGCGAGGGAGGAATTAGATGAGCTAAAGCTG  
ATGTTGATGGCTTACTGACTGGATTAGAGGATGAAGCCTGATCAGGCCTTG  
GAGAAAAAGTGATTGGTGGAGTTGATGCAGATGGTGGAGTTTGGCTTCTTT  
GTGGAATGTCGGGGAGTGGAACCGATAGGTTGGGATGTAATTCAACAAG  
AGTTGGGCCCCTGCAGACCTCAACGGGAAGGCCGAGGAGCCTGATGAGATC  
TCAGCTCGGGGTATAAACTGGCGAAAGTTCTTTGATGATTAGGGAAAAGC  
TGTAAGAACAAATGAGAACACATTTAGTACAGCTAGTAGAAATACATGACCA  
AGTGTTAATAGAAATGCAACAATAGGGTGACTAAGTTCTTACCCCTCGTCTTC  
CCTAAAACTTCTCGGCGCAGAGGGTAGAGATGAAGATCGTTGTCTGGTGC  
AAGCTCCCAAGTTCCCGAGACAATCAAATAATCATTTTCAACGCCTTTATTG  
GAGTCAGGAAGGTCGGCTATGAGCTTGTATTTGGTGGATCTGGGCTTAAGG  
TAGTAAGTATAGCCACTTTTGGATTTCAAGGCCACACATGGTATAGGTAGTAT  
TGAAGGTCAAATAGGGTTATCCTAGCTCTTTCTTGGCATGCCAATTCGGTGA  
CACCGTTGATAACCCTAAAGGTATTGACTGCTAGCTGCAATGGGATTAAGTTT  
GTAAAAGTGAATGACCTCCCTAAAGAAGATGTCTAAGGGAAACCTGAATTC  
ACCATCAATTATAGACACCACTAGAAAGGACATATAGGTCTCCTCGGGCATC  
ATG
